# Supplementary material
Source: publisher site journal article supplement (https://www.dovepress.com/article/82979)
Supplement: Supplementary file 1 [file get_supplementary_file.php]

## 24 Hour

| Protein hit no. | Accession no. | Protein description                                                                    | Protein scor | MW [kDa] | Sequence covered % | Protein PI | 115/114 ratio (ZnONP20) | N  | SD    |
|-----------------|---------------|----------------------------------------------------------------------------------------|--------------|----------|--------------------|------------|-------------------------|----|-------|
| 110             | CH10_MOUSE    | 10 kDa heat shock protein, mitochondrial OS=Mus musculus GN=Hspe1 PE=1 SV=2            | 180          | 12685    | 33.3               | 7.93       | 0.922                   | 5  | 1.051 |
| 54              | 1433B_MOUSE   | 14-3-3 protein beta/alpha OS=Mus musculus GN=Ywhab PE=1 SV=3                           | 345          | 31187    | 20.3               | 4.77       | 0.914                   | 10 | 1.06  |
| 44              | 1433E_MOUSE   | 14-3-3 protein epsilon OS=Mus musculus GN=Ywhae PE=1 SV=1                              | 410          | 32031    | 29.4               | 4.63       | 0.981                   | 12 | 1.058 |
| 118             | 1433F_MOUSE   | 14-3-3 protein eta OS=Mus musculus GN=Ywhah PE=1 SV=2                                  | 161          | 31358    | 15                 | 4.81       | 0.914                   | 5  | 1.059 |
| 65              | 1433G_MOUSE   | 14-3-3 protein gamma OS=Mus musculus GN=Ywhag PE=1 SV=2                                | 300          | 31017    | 22.3               | 4.8        | 0.899                   | 10 | 1.043 |
| 148             | 1433S_MOUSE   | 14-3-3 protein sigma OS=Mus musculus GN=Sfn PE=1 SV=2                                  | 124          | 30519    | 6.5                | 4.72       | 0.906                   | 3  | 1.079 |
| 108             | 1433T_MOUSE   | 14-3-3 protein theta OS=Mus musculus GN=Ywhaq PE=1 SV=1                                | 185          | 30873    | 12.2               | 4.69       | 0.952                   | 4  | 1.096 |
| 20              | 1433Z_MOUSE   | 14-3-3 protein zeta/delta OS=Mus musculus GN=Ywhaz PE=1 SV=1                           | 623          | 30918    | 40.8               | 4.73       | 0.913                   | 14 | 1.053 |
| 236             | THIM_MOUSE    | 3-ketoacyl-CoA thiolase, mitochondrial OS=Mus musculus GN=Acaa2 PE=1 SV=3              | 71           | 45774    | 8.1                | 8.33       | 0.812                   | 3  | 1.106 |
| 253             | RS18_MOUSE    | 40S ribosomal protein S18 OS=Mus musculus GN=Rps18 PE=1 SV=3                           | 63           | 20158    | 7.2                | 10.99      | 0.911                   | 2  | 1.004 |
| 141             | RS19_MOUSE    | 40S ribosomal protein S19 OS=Mus musculus GN=Rps19 PE=1 SV=3                           | 131          | 18381    | 13.1               | 10.41      | 1.138                   | 3  | 1.105 |
| 124             | CH60_MOUSE    | 60 kDa heat shock protein, mitochondrial OS=Mus musculus GN=Hspd1 PE=1 SV=1            | 153          | 68981    | 9.2                | 5.91       | 1.007                   | 6  | 1.059 |
| 116             | RLA0_MOUSE    | 60S acidic ribosomal protein P0 OS=Mus musculus GN=Rplp0 PE=1 SV=3                     | 164          | 37215    | 5.7                | 5.91       | 1.012                   | 6  | 1.043 |
| 266             | RLA1_MOUSE    | 60S acidic ribosomal protein P1 OS=Mus musculus GN=Rplp1 PE=2 SV=1                     | 59           | 12712    | 14                 | 4.28       | 0.964                   | 2  | 1.074 |
| 242             | RLA2_MOUSE    | 60S acidic ribosomal protein P2 OS=Mus musculus GN=Rplp2 PE=1 SV=3                     | 67           | 13229    | 17.4               | 4.42       | 0.932                   | 2  | 1.026 |
| 225             | RL13_MOUSE    | 60S ribosomal protein L13 OS=Mus musculus GN=Rpl13 PE=2 SV=3                           | 77           | 28083    | 5.2                | 11.54      | 0.978                   | 2  | 1.081 |
| 199             | RL23_MOUSE    | 60S ribosomal protein L23 OS=Mus musculus GN=Rpl23 PE=1 SV=1                           | 85           | 17254    | 7.1                | 10.51      | 1.14                    | 2  | 1.035 |
| 146             | RL28_MOUSE    | 60S ribosomal protein L28 OS=Mus musculus GN=Rpl28 PE=1 SV=2                           | 127          | 17931    | 8.8                | 12.02      | 0.95                    | 4  | 1.07  |
| 151             | 6PGD_MOUSE    | 6-phosphogluconate dehydrogenase, decarboxylating OS=Mus musculus GN=Pgd PE=1 SV=3     | 122          | 58671    | 5.6                | 6.81       | 1.024                   | 5  | 1.074 |
| 55              | GRP78_MOUSE   | 78 kDa glucose-regulated protein OS=Mus musculus GN=Hspa5 PE=1 SV=3                    | 344          | 81404    | 11.9               | 5.07       | 1.052                   | 12 | 1.065 |
| 134             | ACON_MOUSE    | Aconitate hydratase, mitochondrial OS=Mus musculus GN=Aco2 PE=1 SV=1                   | 139          | 93933    | 7.2                | 8.08       | 0.573                   | 5  | 1.088 |
| 11              | ACTA_MOUSE    | Actin, aortic smooth muscle OS=Mus musculus GN=Acta2 PE=1 SV=1                         | 982          | 45186    | 28.4               | 5.23       | 1.072                   | 37 | 1.039 |
| 7               | ACTB_MOUSE    | Actin, cytoplasmic 1 OS=Mus musculus GN=Actb PE=1 SV=1                                 | 1578         | 44868    | 50.4               | 5.29       | 1.095                   | 52 | 1.042 |
| 185             | ARP3_MOUSE    | Actin-related protein 3 OS=Mus musculus GN=Actr3 PE=1 SV=3                             | 94           | 51153    | 7.7                | 5.61       | 0.939                   | 3  | 1.032 |
| 277             | ACBP_MOUSE    | Acyl-CoA-binding protein OS=Mus musculus GN=Dbi PE=1 SV=2                              | 55           | 12300    | 25.3               | 8.78       | 0.862                   | 2  | 1.073 |
| 156             | CAP1_MOUSE    | Adenylyl cyclase-associated protein 1 OS=Mus musculus GN=Cap1 PE=1 SV=4                | 118          | 57717    | 12.9               | 7.16       | 0.794                   | 3  | 1.095 |
| 69              | ARF1_MOUSE    | ADP-ribosylation factor 1 OS=Mus musculus GN=Arf1 PE=1 SV=2                            | 286          | 22459    | 30.9               | 6.32       | 1.023                   | 10 | 1.079 |
| 74              | ARF5_MOUSE    | ADP-ribosylation factor 5 OS=Mus musculus GN=Arf5 PE=1 SV=2                            | 273          | 22338    | 20.6               | 6.3        | 1.064                   | 8  | 1.061 |
| 126             | RAGE_MOUSE    | Advanced glycosylation end product-specific receptor OS=Mus musculus GN=Ager PE=1 SV=1 | 151          | 45224    | 17.9               | 5.78       | 0.919                   | 7  | 1.038 |

|     |             |                                                                               |     |        |      |      |       |    |         |
|-----|-------------|-------------------------------------------------------------------------------|-----|--------|------|------|-------|----|---------|
| 170 | AKA12_MOUSE | A-kinase anchor protein 12 OS=Mus musculus GN=Akap12 PE=1 SV=1                | 103 | 199347 | 1.7  | 4.39 | 0.975 | 2  | 1.073   |
| 191 | AKAP5_MOUSE | A-kinase anchor protein 5 OS=Mus musculus GN=Akap5 PE=1 SV=2                  | 89  | 88088  | 4.3  | 4.72 | 0.852 | 2  | 1.049   |
| 244 | AK1A1_MOUSE | Alcohol dehydrogenase [NADP(+)] OS=Mus musculus GN=Akr1a1 PE=1 SV=3           | 67  | 39774  | 8.3  | 6.9  | 0.9   | 3  | 1.101   |
| 223 | ADH1_MOUSE  | Alcohol dehydrogenase 1 OS=Mus musculus GN=Adh1 PE=1 SV=2                     | 77  | 44758  | 4.3  | 8.44 | 1.069 | 2  | 1.026   |
| 34  | ALDH2_MOUSE | Aldehyde dehydrogenase, mitochondrial OS=Mus musculus GN=Aldh2 PE=1 SV=1      | 509 | 61383  | 27   | 7.53 | 0.93  | 20 | 1.049   |
| 99  | ALDR_MOUSE  | Aldose reductase OS=Mus musculus GN=Akr1b1 PE=1 SV=3                          | 205 | 39876  | 10.8 | 6.71 | 0.94  | 6  | 1.024   |
| 80  | A1AT2_MOUSE | Alpha-1-antitrypsin 1-2 OS=Mus musculus GN=Serpina1b PE=1 SV=2                | 260 | 49974  | 22.3 | 5.32 | 1.026 | 12 | 1.054   |
| 62  | A1AT3_MOUSE | Alpha-1-antitrypsin 1-3 OS=Mus musculus GN=Serpina1c PE=1 SV=2                | 308 | 49535  | 22.3 | 5.25 | 1.089 | 12 | 1.033   |
| 88  | A1AT4_MOUSE | Alpha-1-antitrypsin 1-4 OS=Mus musculus GN=Serpina1d PE=2 SV=1                | 233 | 49710  | 16.9 | 5.24 | 1.031 | 11 | 1.039   |
| 233 | FETUA_MOUSE | Alpha-2-HS-glycoprotein OS=Mus musculus GN=Ahsg PE=1 SV=1                     | 72  | 40107  | 2.3  | 6.04 | 0.994 | 2  | 1.038   |
| 37  | A2M_MOUSE   | Alpha-2-macroglobulin OS=Mus musculus GN=A2m PE=1 SV=3                        | 486 | 180541 | 7.8  | 6.24 | 0.959 | 21 | 1.019   |
| 83  | ACTN4_MOUSE | Alpha-actinin-4 OS=Mus musculus GN=Actn4 PE=1 SV=1                            | 246 | 113493 | 7    | 5.25 | 0.928 | 8  | 1.069   |
| 24  | ENOA_MOUSE  | Alpha-enolase OS=Mus musculus GN=Eno1 PE=1 SV=3                               | 579 | 52431  | 30   | 6.37 | 0.878 | 21 | 1.043   |
| 213 | PARVA_MOUSE | Alpha-parvin OS=Mus musculus GN=Parva PE=1 SV=1                               | 80  | 47105  | 9.4  | 5.69 | 0.958 | 3  | 1.024   |
| 96  | ACE_MOUSE   | Angiotensin-converting enzyme OS=Mus musculus GN=Ace PE=1 SV=3                | 208 | 160446 | 5.6  | 6.1  | 0.938 | 11 | 1.055   |
| 188 | ANXA1_MOUSE | Annexin A1 OS=Mus musculus GN=Anxa1 PE=1 SV=2                                 | 92  | 43263  | 8.4  | 6.97 | 1.668 | 3  | 1.525   |
| 162 | ANXA2_MOUSE | Annexin A2 OS=Mus musculus GN=Anxa2 PE=1 SV=2                                 | 113 | 43781  | 8.3  | 7.55 | 1.295 | 4  | 1.073   |
| 66  | ANXA3_MOUSE | Annexin A3 OS=Mus musculus GN=Anxa3 PE=1 SV=4                                 | 294 | 40390  | 26.3 | 5.5  | 1.037 | 10 | 1.09    |
| 41  | ANXA5_MOUSE | Annexin A5 OS=Mus musculus GN=Anxa5 PE=1 SV=1                                 | 431 | 38946  | 29.2 | 4.83 | 1.146 | 15 | 1.066   |
| 176 | ANXA6_MOUSE | Annexin A6 OS=Mus musculus GN=Anxa6 PE=1 SV=3                                 | 100 | 84131  | 4.6  | 5.34 | 1.02  | 3  | 1.081   |
| 86  | APOA1_MOUSE | Apolipoprotein A-I OS=Mus musculus GN=Apoa1 PE=1 SV=2                         | 240 | 33479  | 21.6 | 5.51 | 1.248 | 10 | 1.06    |
| 284 | APOA2_MOUSE | Apolipoprotein A-II OS=Mus musculus GN=Apoa2 PE=1 SV=2                        | 53  | 12789  | 9.8  | 6.56 | 1.364 | 2  | 1.01    |
| 157 | ATPA_MOUSE  | ATP synthase subunit alpha, mitochondrial OS=Mus musculus GN=Atp5a1 PE=1 SV=1 | 118 | 64419  | 8.3  | 9.22 | 0.853 | 3  | 1.038   |
| 164 | ATPB_MOUSE  | ATP synthase subunit beta, mitochondrial OS=Mus musculus GN=Atp5b PE=1 SV=2   | 108 | 59724  | 7.6  | 5.19 | 0.849 | 4  | 1.017   |
| 163 | ATPD_MOUSE  | ATP synthase subunit delta, mitochondrial OS=Mus musculus GN=Atp5d PE=1 SV=1  | 112 | 18310  | 8.3  | 5.03 | 0.792 | 2  | 1.025   |
| 204 | ACLY_MOUSE  | ATP-citrate synthase OS=Mus musculus GN=Acly PE=1 SV=1                        | 84  | 131195 | 2    | 7.13 | 0.699 | 3  | [1.063] |
| 189 | E41L2_MOUSE | Band 4.1-like protein 2 OS=Mus musculus GN=Epb4112 PE=1 SV=2                  | 92  | 121815 | 2    | 5.31 | 0.979 | 2  | 1.029   |
| 29  | ACTBL_MOUSE | Beta-actin-like protein 2 OS=Mus musculus GN=Actbl2 PE=1 SV=1                 | 520 | 44991  | 23.7 | 5.3  | 1.054 | 23 | 1.041   |
| 75  | ENOB_MOUSE  | Beta-enolase OS=Mus musculus GN=Eno3 PE=1 SV=3                                | 273 | 52747  | 21.9 | 6.73 | 0.862 | 11 | 1.045   |
| 61  | CALM_MOUSE  | Calmodulin OS=Mus musculus GN=Calm1 PE=1 SV=2                                 | 308 | 18124  | 33.6 | 4.09 | 1.086 | 8  | 1.056   |
| 201 | CPNS1_MOUSE | Calpain small subunit 1 OS=Mus musculus GN=Capns1 PE=2 SV=1                   | 85  | 30266  | 10.4 | 5.41 | 0.801 | 2  | 1.003   |
| 205 | CAN2_MOUSE  | Calpain-2 catalytic subunit OS=Mus musculus GN=Capn2 PE=2 SV=4                | 84  | 86564  | 1.1  | 4.86 | 0.976 | 2  | 1.054   |

|     |             |                                                                                     |      |        |      |      |       |    |         |
|-----|-------------|-------------------------------------------------------------------------------------|------|--------|------|------|-------|----|---------|
| 230 | ICAL_MOUSE  | Calpastatin OS=Mus musculus GN=Cast PE=1 SV=2                                       | 75   | 99609  | 1.6  | 5.37 | 0.762 | 2  | 1.009   |
| 56  | CALR_MOUSE  | Calreticulin OS=Mus musculus GN=Calr PE=1 SV=1                                      | 341  | 54443  | 23.6 | 4.33 | 0.931 | 14 | 1.025   |
| 147 | CAH1_MOUSE  | Carbonic anhydrase 1 OS=Mus musculus GN=Ca1 PE=2 SV=4                               | 127  | 30521  | 7.7  | 6.44 | 0.986 | 3  | 1.061   |
| 27  | CAH2_MOUSE  | Carbonic anhydrase 2 OS=Mus musculus GN=Ca2 PE=1 SV=4                               | 549  | 31989  | 44.2 | 6.49 | 1.078 | 18 | 1.042   |
| 93  | CAH3_MOUSE  | Carbonic anhydrase 3 OS=Mus musculus GN=Ca3 PE=1 SV=3                               | 214  | 32460  | 9.2  | 6.89 | 0.554 | 5  | 1.078   |
| 5   | CBR2_MOUSE  | Carbonyl reductase [NADPH] 2 OS=Mus musculus GN=Cbr2 PE=1 SV=1                      | 2259 | 28339  | 62.7 | 9.1  | 0.938 | 60 | 1.028   |
| 64  | EST1C_MOUSE | Carboxylesterase 1C OS=Mus musculus GN=Ces1c PE=1 SV=4                              | 303  | 65138  | 8.3  | 4.97 | 0.998 | 9  | 1.053   |
| 43  | CES1D_MOUSE | Carboxylesterase 1D OS=Mus musculus GN=Ces1d PE=1 SV=1                              | 423  | 67022  | 22.8 | 6.17 | 0.922 | 18 | 1.032   |
| 105 | CATA_MOUSE  | Catalase OS=Mus musculus GN=Cat PE=1 SV=4                                           | 189  | 64743  | 9.7  | 7.72 | 0.856 | 9  | [1.052] |
| 208 | CTNB1_MOUSE | Catenin beta-1 OS=Mus musculus GN=Ctnnb1 PE=1 SV=1                                  | 83   | 89813  | 1.5  | 5.53 | 0.86  | 2  | 1.113   |
| 299 | CATD_MOUSE  | Cathepsin D OS=Mus musculus GN=Ctsd PE=1 SV=1                                       | 49   | 49616  | 4.4  | 6.71 | 0.941 | 2  | 1.066   |
| 59  | CDC42_MOUSE | Cell division control protein 42 homolog OS=Mus musculus GN=Cdc42 PE=1 SV=2         | 322  | 24115  | 29.8 | 6.15 | 1.04  | 9  | 1.038   |
| 324 | CE164_MOUSE | Centrosomal protein of 164 kDa OS=Mus musculus GN=Cep164 PE=2 SV=2                  | 43   | 178145 | 0.8  | 5.22 | 0.931 | 2  | 1.034   |
| 222 | CLIC1_MOUSE | Chloride intracellular channel protein 1 OS=Mus musculus GN=Clic1 PE=1 SV=3         | 78   | 29866  | 12.4 | 5.09 | 1.092 | 2  | 1.03    |
| 115 | CLIC5_MOUSE | Chloride intracellular channel protein 5 OS=Mus musculus GN=Clic5 PE=1 SV=1         | 168  | 31578  | 12.7 | 5.64 | 1.065 | 4  | 1.059   |
| 178 | CISY_MOUSE  | Citrate synthase, mitochondrial OS=Mus musculus GN=Cs PE=1 SV=1                     | 99   | 55968  | 6.9  | 8.72 | 0.634 | 4  | 1.304   |
| 184 | CLH1_MOUSE  | Clathrin heavy chain 1 OS=Mus musculus GN=Cltc PE=1 SV=3                            | 95   | 206982 | 1.9  | 5.48 | 1.112 | 3  | 1.032   |
| 60  | COF1_MOUSE  | Cofilin-1 OS=Mus musculus GN=Cfl1 PE=1 SV=3                                         | 320  | 22478  | 39.8 | 8.22 | 0.932 | 11 | 1.061   |
| 72  | CO3_MOUSE   | Complement C3 OS=Mus musculus GN=C3 PE=1 SV=3                                       | 279  | 204900 | 6.4  | 6.29 | 1.079 | 12 | 1.051   |
| 193 | COR1C_MOUSE | Coronin-1C OS=Mus musculus GN=Coro1c PE=1 SV=2                                      | 88   | 58971  | 4.2  | 6.65 | 0.928 | 4  | 1.079   |
| 219 | KCRB_MOUSE  | Creatine kinase B-type OS=Mus musculus GN=Ckb PE=1 SV=1                             | 80   | 45942  | 9.7  | 5.4  | 0.703 | 4  | 1.112   |
| 63  | KCRM_MOUSE  | Creatine kinase M-type OS=Mus musculus GN=Ckm PE=1 SV=1                             | 306  | 48101  | 20.5 | 6.58 | 0.828 | 12 | 1.076   |
| 290 | CSRP1_MOUSE | Cysteine and glycine-rich protein 1 OS=Mus musculus GN=Csrp1 PE=1 SV=3              | 51   | 24718  | 13   | 8.9  | 1.156 | 2  | 1.032   |
| 220 | CRIP2_MOUSE | Cysteine-rich protein 2 OS=Mus musculus GN=Crip2 PE=1 SV=1                          | 79   | 26670  | 13.9 | 8.94 | 1.53  | 3  | 1.271   |
| 270 | CYB5_MOUSE  | Cytochrome b5 OS=Mus musculus GN=Cyb5a PE=1 SV=2                                    | 57   | 16817  | 6.7  | 4.96 | 0.944 | 2  | 1.019   |
| 95  | CYC_MOUSE   | Cytochrome c, somatic OS=Mus musculus GN=Cycc PE=1 SV=2                             | 210  | 14428  | 28.6 | 9.61 | 0.729 | 7  | 1.054   |
| 249 | CP2F2_MOUSE | Cytochrome P450 2F2 OS=Mus musculus GN=Cyp2f2 PE=2 SV=1                             | 65   | 59267  | 2    | 7.74 | 0.892 | 2  | 1.055   |
| 70  | DEST_MOUSE  | Destrin OS=Mus musculus GN=Dstn PE=1 SV=3                                           | 285  | 21956  | 28.5 | 8.14 | 0.984 | 9  | 1.063   |
| 12  | DPYL2_MOUSE | Dihydropyrimidinase-related protein 2 OS=Mus musculus GN=Dpysl2 PE=1 SV=2           | 941  | 67316  | 47.9 | 5.95 | 0.939 | 29 | 1.033   |
| 265 | FMO1_MOUSE  | Dimethylaniline monooxygenase [N-oxide-forming] 1 OS=Mus musculus GN=Fmo1 PE=1 SV=1 | 60   | 65524  | 5.3  | 8.72 | 1.103 | 3  | 1.106   |
| 114 | FMO2_MOUSE  | Dimethylaniline monooxygenase [N-oxide-forming] 2 OS=Mus musculus GN=Fmo2 PE=1 SV=3 | 170  | 66635  | 12.7 | 8.68 | 0.962 | 7  | 1.061   |
| 58  | EHD2_MOUSE  | EH domain-containing protein 2 OS=Mus musculus GN=Ehd2 PE=1 SV=1                    | 328  | 67038  | 20.4 | 6.08 | 1.004 | 15 | 1.051   |

|     |             |                                                                                               |     |        |      |      |       |    |         |
|-----|-------------|-----------------------------------------------------------------------------------------------|-----|--------|------|------|-------|----|---------|
| 94  | EHD4_MOUSE  | EH domain-containing protein 4 OS=Mus musculus GN=Ehd4 PE=1 SV=1                              | 210 | 67678  | 16.8 | 6.33 | 1.11  | 9  | 1.078   |
| 194 | ETFA_MOUSE  | Electron transfer flavoprotein subunit alpha, mitochondrial OS=Mus musculus GN=Etfa PE=1 SV=2 | 88  | 39154  | 18   | 8.62 | 0.694 | 4  | [1.260] |
| 310 | ETFB_MOUSE  | Electron transfer flavoprotein subunit beta OS=Mus musculus GN=Etfb PE=1 SV=3                 | 45  | 31681  | 5.1  | 8.24 | 0.776 | 2  | 1.021   |
| 36  | EF1A1_MOUSE | Elongation factor 1-alpha 1 OS=Mus musculus GN=Eef1a1 PE=1 SV=3                               | 494 | 57275  | 19.5 | 9.1  | 1.083 | 17 | 1.027   |
| 217 | EF1B_MOUSE  | Elongation factor 1-beta OS=Mus musculus GN=Eef1b PE=1 SV=5                                   | 80  | 28275  | 8.9  | 4.53 | 1.099 | 3  | 1.081   |
| 190 | EF2_MOUSE   | Elongation factor 2 OS=Mus musculus GN=Eef2 PE=1 SV=2                                         | 92  | 105401 | 5.2  | 6.41 | 1.125 | 4  | 1.108   |
| 235 | EVL_MOUSE   | Ena/VASP-like protein OS=Mus musculus GN=Evl PE=1 SV=2                                        | 71  | 47717  | 8.9  | 8.92 | ---   | 1  | ---     |
| 47  | ENPL_MOUSE  | Endoplasmin OS=Mus musculus GN=Hsp90b1 PE=1 SV=2                                              | 379 | 103744 | 10.6 | 4.74 | 0.937 | 11 | 1.037   |
| 313 | ECHM_MOUSE  | Enoyl-CoA hydratase, mitochondrial OS=Mus musculus GN=Echs1 PE=1 SV=1                         | 45  | 35090  | 5.2  | 8.76 | 0.837 | 2  | 1.053   |
| 301 | IF4B_MOUSE  | Eukaryotic translation initiation factor 4B OS=Mus musculus GN=Eif4b PE=1 SV=1                | 48  | 74413  | 2.5  | 5.47 | 1.151 | 2  | 1.215   |
| 260 | IF5A1_MOUSE | Eukaryotic translation initiation factor 5A-1 OS=Mus musculus GN=Eif5a PE=1 SV=2              | 62  | 19023  | 10.4 | 5.08 | 1.1   | 2  | 1.027   |
| 192 | SODE_MOUSE  | Extracellular superoxide dismutase [Cu-Zn] OS=Mus musculus GN=Sod3 PE=1 SV=1                  | 88  | 28948  | 7.6  | 6.36 | 0.886 | 2  | 1.11    |
| 30  | EZRI_MOUSE  | Ezrin OS=Mus musculus GN=Ezr PE=1 SV=3                                                        | 519 | 77525  | 21.3 | 5.83 | 0.924 | 22 | 1.047   |
| 81  | FAS_MOUSE   | Fatty acid synthase OS=Mus musculus GN=Fasn PE=1 SV=2                                         | 254 | 289307 | 3    | 6.13 | 0.654 | 9  | 1.045   |
| 226 | FABP4_MOUSE | Fatty acid-binding protein, adipocyte OS=Mus musculus GN=Fabp4 PE=1 SV=3                      | 77  | 16894  | 9.1  | 8.53 | 0.287 | 2  | 1.042   |
| 215 | FERM2_MOUSE | Fermitin family homolog 2 OS=Mus musculus GN=Fermt2 PE=1 SV=1                                 | 80  | 87237  | 1.5  | 6.26 | 0.966 | 2  | 1.004   |
| 16  | FLNA_MOUSE  | Filamin-A OS=Mus musculus GN=Flna PE=1 SV=5                                                   | 704 | 306546 | 9.1  | 5.68 | 1.047 | 25 | 1.03    |
| 123 | BLVRB_MOUSE | Flavin reductase (NADPH) OS=Mus musculus GN=Blvrb PE=2 SV=3                                   | 154 | 23716  | 22.8 | 6.49 | 1.041 | 5  | 1.032   |
| 89  | FHL1_MOUSE  | Four and a half LIM domains protein 1 OS=Mus musculus GN=Fhl1 PE=1 SV=3                       | 223 | 38618  | 11.1 | 8.76 | 1.128 | 5  | 1.042   |
| 21  | ALDOA_MOUSE | Fructose-bisphosphate aldolase A OS=Mus musculus GN=Aldoa PE=1 SV=2                           | 616 | 43590  | 32.1 | 8.31 | 0.928 | 17 | 1.03    |
| 113 | FUMH_MOUSE  | Fumarate hydratase, mitochondrial OS=Mus musculus GN=Fh PE=1 SV=3                             | 170 | 59261  | 8.1  | 9.12 | 0.822 | 5  | 1.033   |
| 263 | LEG1_MOUSE  | Galectin-1 OS=Mus musculus GN=Lgals1 PE=1 SV=3                                                | 60  | 16573  | 17   | 5.32 | 0.852 | 2  | 1.033   |
| 256 | G6PI_MOUSE  | Glucose-6-phosphate isomerase OS=Mus musculus GN=Gpi PE=1 SV=4                                | 63  | 68963  | 3.2  | 8.14 | 0.955 | 2  | 1.044   |
| 173 | GLU2B_MOUSE | Glucosidase 2 subunit beta OS=Mus musculus GN=Prkcsh PE=1 SV=1                                | 102 | 64149  | 2.3  | 4.41 | 0.907 | 2  | 1.103   |
| 239 | DHE3_MOUSE  | Glutamate dehydrogenase 1, mitochondrial OS=Mus musculus GN=Glud1 PE=1 SV=1                   | 70  | 66618  | 3.8  | 8.05 | 0.891 | 3  | [1.192] |
| 286 | GSHR_MOUSE  | Glutathione reductase, mitochondrial OS=Mus musculus GN=Gsr PE=1 SV=3                         | 52  | 59178  | 1.6  | 8.19 | 0.959 | 2  | 1.01    |
| 179 | GSTA3_MOUSE | Glutathione S-transferase A3 OS=Mus musculus GN=Gsta3 PE=1 SV=2                               | 98  | 28416  | 13.6 | 8.76 | 0.953 | 4  | 1.049   |
| 275 | GSTA4_MOUSE | Glutathione S-transferase A4 OS=Mus musculus GN=Gsta4 PE=1 SV=3                               | 55  | 28285  | 6.3  | 6.77 | 0.943 | 2  | 1.027   |
| 49  | GSTM1_MOUSE | Glutathione S-transferase Mu 1 OS=Mus musculus GN=Gstm1 PE=1 SV=2                             | 372 | 28783  | 44.5 | 7.71 | 0.959 | 16 | 1.046   |
| 67  | GSTM2_MOUSE | Glutathione S-transferase Mu 2 OS=Mus musculus GN=Gstm2 PE=1 SV=2                             | 290 | 29008  | 35.3 | 6.9  | 0.955 | 12 | [1.047] |
| 98  | GSTM4_MOUSE | Glutathione S-transferase Mu 3 OS=Mus musculus GN=Gstm3 PE=1 SV=2                             | 207 | 28319  | 26.6 | 7.63 | 0.969 | 10 | [1.062] |
| 102 | GSTM7_MOUSE | Glutathione S-transferase Mu 7 OS=Mus musculus GN=Gstm7 PE=1 SV=1                             | 199 | 28136  | 20.6 | 6.34 | 0.966 | 9  | [1.048] |

|     |             |                                                                                            |      |        |      |      |       |     |         |
|-----|-------------|--------------------------------------------------------------------------------------------|------|--------|------|------|-------|-----|---------|
| 203 | GSTO1_MOUSE | Glutathione S-transferase omega-1 OS=Mus musculus GN=Gsto1 PE=2 SV=2                       | 84   | 30978  | 5.8  | 6.92 | 1.058 | 2   | 1.076   |
| 166 | GSTP1_MOUSE | Glutathione S-transferase P 1 OS=Mus musculus GN=Gstp1 PE=1 SV=2                           | 106  | 25605  | 18.6 | 7.68 | 0.933 | 4   | 1.111   |
| 39  | G3P_MOUSE   | Glyceraldehyde-3-phosphate dehydrogenase OS=Mus musculus GN=Gapdh PE=1 SV=2                | 448  | 39908  | 25.8 | 8.44 | 0.96  | 12  | 1.036   |
| 317 | GON4L_MOUSE | GON-4-like protein OS=Mus musculus GN=Gon4l PE=1 SV=3                                      | 44   | 272140 | 0.3  | 4.79 | 0.99  | 2   | 1.024   |
| 158 | RAN_MOUSE   | GTP-binding nuclear protein Ran OS=Mus musculus GN=Ran PE=1 SV=3                           | 116  | 27284  | 10.2 | 7.01 | 1.142 | 3   | 1.077   |
| 234 | GNAI2_MOUSE | Guanine nucleotide-binding protein G(i) subunit alpha-2 OS=Mus musculus GN=Gnai2 PE=1 SV=5 | 71   | 44958  | 7.3  | 5.28 | 0.859 | 2   | 1.007   |
| 238 | HPT_MOUSE   | Haptoglobin OS=Mus musculus GN=Hp PE=1 SV=1                                                | 70   | 42456  | 8.6  | 5.88 | 0.973 | 3   | 1.094   |
| 48  | HS71L_MOUSE | Heat shock 70 kDa protein 1-like OS=Mus musculus GN=Hspa1l PE=2 SV=4                       | 378  | 78552  | 11.1 | 5.91 | 1.194 | 12  | 1.1     |
| 294 | HSP74_MOUSE | Heat shock 70 kDa protein 4 OS=Mus musculus GN=Hspa4 PE=1 SV=1                             | 50   | 106678 | 1.8  | 5.15 | 1.055 | 2   | 1.038   |
| 9   | HSP7C_MOUSE | Heat shock cognate 71 kDa protein OS=Mus musculus GN=Hspa8 PE=1 SV=1                       | 1070 | 78937  | 33.4 | 5.37 | 1.095 | 39  | 1.036   |
| 150 | TRAP1_MOUSE | Heat shock protein 75 kDa, mitochondrial OS=Mus musculus GN=Trap1 PE=1 SV=1                | 122  | 87495  | 2    | 6.25 | 1.061 | 2   | 1.008   |
| 23  | HS90A_MOUSE | Heat shock protein HSP 90-alpha OS=Mus musculus GN=Hsp90aa1 PE=1 SV=4                      | 588  | 96729  | 16.1 | 4.93 | 0.995 | 20  | 1.035   |
| 14  | HS90B_MOUSE | Heat shock protein HSP 90-beta OS=Mus musculus GN=Hsp90ab1 PE=1 SV=3                       | 820  | 94457  | 22.1 | 4.97 | 0.958 | 28  | 1.033   |
| 32  | HSP72_MOUSE | Heat shock-related 70 kDa protein 2 OS=Mus musculus GN=Hspa2 PE=1 SV=2                     | 516  | 77466  | 12.2 | 5.51 | 1.108 | 16  | 1.057   |
| 4   | HBA_MOUSE   | Hemoglobin subunit alpha OS=Mus musculus GN=Hba PE=1 SV=2                                  | 4300 | 16851  | 71.8 | 7.96 | 1.138 | 108 | 1.067   |
| 1   | HBB1_MOUSE  | Hemoglobin subunit beta-1 OS=Mus musculus GN=Hbb-b1 PE=1 SV=2                              | 9684 | 17651  | 93.9 | 7.12 | 1.178 | 245 | [1.019] |
| 2   | HBB2_MOUSE  | Hemoglobin subunit beta-2 OS=Mus musculus GN=Hbb-b2 PE=1 SV=2                              | 5647 | 17834  | 93.9 | 7.85 | 1.193 | 152 | [1.032] |
| 258 | HEMO_MOUSE  | Hemopexin OS=Mus musculus GN=Hpx PE=1 SV=2                                                 | 62   | 55053  | 5.4  | 7.92 | 1.1   | 3   | 1.047   |
| 186 | ROA0_MOUSE  | Heterogeneous nuclear ribonucleoprotein A0 OS=Mus musculus GN=Hnrmpa0 PE=1 SV=1            | 94   | 33388  | 2.3  | 9.35 | 0.957 | 3   | 1.074   |
| 145 | ROA1_MOUSE  | Heterogeneous nuclear ribonucleoprotein A1 OS=Mus musculus GN=Hnrmpa1 PE=1 SV=2            | 128  | 37005  | 7.2  | 9.27 | 1.017 | 5   | 1.067   |
| 149 | ROA3_MOUSE  | Heterogeneous nuclear ribonucleoprotein A3 OS=Mus musculus GN=Hnrmpa3 PE=1 SV=1            | 122  | 42982  | 4.2  | 9.1  | 0.962 | 4   | 1.052   |
| 195 | HNRPF_MOUSE | Heterogeneous nuclear ribonucleoprotein F OS=Mus musculus GN=Hnrnpf PE=1 SV=3              | 88   | 48427  | 3.9  | 5.31 | 1.08  | 2   | 1.001   |
| 136 | HNRPK_MOUSE | Heterogeneous nuclear ribonucleoprotein K OS=Mus musculus GN=Hnrnpk PE=1 SV=1              | 135  | 54489  | 7.3  | 5.39 | 0.94  | 4   | 1.106   |
| 138 | ROA2_MOUSE  | Heterogeneous nuclear ribonucleoproteins A2/B1 OS=Mus musculus GN=Hnrmpa2b1 PE=1 SV=2      | 135  | 40308  | 6.8  | 8.97 | 1.004 | 5   | 1.07    |
| 133 | HMGB1_MOUSE | High mobility group protein B1 OS=Mus musculus GN=Hmgb1 PE=1 SV=2                          | 141  | 31357  | 21.9 | 5.62 | 0.907 | 7   | 1.052   |
| 303 | HMGB2_MOUSE | High mobility group protein B2 OS=Mus musculus GN=Hmgb2 PE=1 SV=3                          | 48   | 30193  | 10.5 | 6.88 | 1.034 | 2   | 1.094   |
| 155 | HCDH_MOUSE  | Hydroxyacyl-coenzyme A dehydrogenase, mitochondrial OS=Mus musculus GN=Hadh PE=1 SV=2      | 119  | 39047  | 7    | 8.76 | 0.819 | 4   | 1.047   |
| 243 | GLO2_MOUSE  | Hydroxyacylglutathione hydrolase, mitochondrial OS=Mus musculus GN=Hagh PE=1 SV=2          | 67   | 37889  | 3.9  | 7.66 | 1.003 | 2   | 1.131   |
| 300 | IGHM_MOUSE  | Ig mu chain C region OS=Mus musculus GN=Ighm PE=1 SV=2                                     | 49   | 54383  | 1.5  | 6.56 | 0.964 | 2   | 1.043   |
| 35  | INMT_MOUSE  | Indolethylamine N-methyltransferase OS=Mus musculus GN=Inmt PE=1 SV=1                      | 505  | 32541  | 37.5 | 6    | 0.957 | 14  | 1.04    |
| 129 | ITB1_MOUSE  | Integrin beta-1 OS=Mus musculus GN=Itgb1 PE=1 SV=1                                         | 147  | 99008  | 4    | 5.68 | 0.965 | 4   | 1.022   |
| 268 | IRF8_MOUSE  | Interferon regulatory factor 8 OS=Mus musculus GN=Irf8 PE=1 SV=1                           | 58   | 52498  | 1.9  | 6.38 | 0.892 | 2   | 1.114   |

|     |             |                                                                                                |      |        |      |      |       |    |       |
|-----|-------------|------------------------------------------------------------------------------------------------|------|--------|------|------|-------|----|-------|
| 168 | IDH3A_MOUSE | Isocitrate dehydrogenase [NAD] subunit alpha, mitochondrial OS=Mus musculus GN=Idh3a PE=1 SV=1 | 105  | 43728  | 3    | 6.27 | 0.868 | 2  | 1.013 |
| 112 | IDHP_MOUSE  | Isocitrate dehydrogenase [NADP], mitochondrial OS=Mus musculus GN=Idh2 PE=1 SV=3               | 176  | 56718  | 5.5  | 8.88 | 0.917 | 6  | 1.06  |
| 196 | PLAK_MOUSE  | Junction plakoglobin OS=Mus musculus GN=Jup PE=1 SV=3                                          | 88   | 87102  | 3.1  | 5.75 | 0.963 | 3  | 1.101 |
| 218 | KATL2_MOUSE | Katanin p60 ATPase-containing subunit A-like 2 OS=Mus musculus GN=Katnal2 PE=2 SV=2            | 80   | 67489  | 2.2  | 7.19 | 1.075 | 2  | 1.19  |
| 228 | K1C18_MOUSE | Keratin, type I cytoskeletal 18 OS=Mus musculus GN=Krt18 PE=1 SV=5                             | 76   | 50968  | 5.9  | 5.22 | 1.048 | 3  | 1.018 |
| 127 | K1C19_MOUSE | Keratin, type I cytoskeletal 19 OS=Mus musculus GN=Krt19 PE=1 SV=1                             | 150  | 47397  | 13.9 | 5.28 | 1.139 | 6  | 1.052 |
| 262 | K22O_MOUSE  | Keratin, type II cytoskeletal 2 oral OS=Mus musculus GN=Krt76 PE=2 SV=1                        | 61   | 68408  | 2.7  | 8.68 | 0.964 | 2  | 1.291 |
| 246 | K2C7_MOUSE  | Keratin, type II cytoskeletal 7 OS=Mus musculus GN=Krt7 PE=1 SV=1                              | 66   | 54713  | 6.1  | 5.67 | 1.11  | 3  | 1.207 |
| 120 | K2C8_MOUSE  | Keratin, type II cytoskeletal 8 OS=Mus musculus GN=Krt8 PE=1 SV=4                              | 158  | 59431  | 9.8  | 5.7  | 1.084 | 6  | 1.084 |
| 160 | KNG1_MOUSE  | Kininogen-1 OS=Mus musculus GN=Kng1 PE=1 SV=1                                                  | 115  | 79982  | 4.2  | 6.05 | 0.98  | 4  | 1.06  |
| 287 | LGUL_MOUSE  | Lactoylglutathione lyase OS=Mus musculus GN=Glo1 PE=1 SV=3                                     | 51   | 23672  | 9.2  | 5.24 | 0.857 | 2  | 1.129 |
| 282 | LAMC1_MOUSE | Laminin subunit gamma-1 OS=Mus musculus GN=Lamc1 PE=1 SV=2                                     | 53   | 193266 | 0.7  | 5.08 | 0.977 | 2  | 1.001 |
| 289 | LKHA4_MOUSE | Leukotriene A-4 hydrolase OS=Mus musculus GN=Lta4h PE=1 SV=4                                   | 51   | 75133  | 2.9  | 5.98 | 1.077 | 2  | 1.087 |
| 84  | LDHA_MOUSE  | L-lactate dehydrogenase A chain OS=Mus musculus GN=Ldha PE=1 SV=3                              | 245  | 40786  | 28.6 | 7.62 | 0.936 | 12 | 1.042 |
| 111 | LDHB_MOUSE  | L-lactate dehydrogenase B chain OS=Mus musculus GN=Ldhb PE=1 SV=2                              | 178  | 40526  | 12.9 | 5.7  | 0.83  | 6  | 1.071 |
| 119 | ACADL_MOUSE | Long-chain specific acyl-CoA dehydrogenase, mitochondrial OS=Mus musculus GN=Acadl PE=1 SV=2   | 158  | 52378  | 10.2 | 8.53 | 0.715 | 5  | 1.063 |
| 77  | MDHC_MOUSE  | Malate dehydrogenase, cytoplasmic OS=Mus musculus GN=Mdh1 PE=1 SV=3                            | 265  | 41093  | 20.4 | 6.16 | 0.804 | 11 | 1.033 |
| 53  | MDHM_MOUSE  | Malate dehydrogenase, mitochondrial OS=Mus musculus GN=Mdh2 PE=1 SV=3                          | 352  | 39703  | 38.2 | 8.93 | 0.737 | 13 | 1.086 |
| 177 | MAP4_MOUSE  | Microtubule-associated protein 4 OS=Mus musculus GN=Map4 PE=1 SV=3                             | 99   | 131074 | 2.9  | 4.9  | 0.932 | 3  | 1.175 |
| 8   | MOES_MOUSE  | Moesin OS=Mus musculus GN=Msn PE=1 SV=3                                                        | 1387 | 77184  | 45.4 | 6.22 | 0.98  | 52 | 1.026 |
| 139 | MUG1_MOUSE  | Murinoglobulin-1 OS=Mus musculus GN=Mug1 PE=1 SV=3                                             | 134  | 180032 | 2.7  | 6    | 1.019 | 5  | 1.042 |
| 19  | MYG_MOUSE   | Myoglobin OS=Mus musculus GN=Mb PE=1 SV=3                                                      | 642  | 20131  | 40.3 | 7.07 | 0.755 | 16 | 1.041 |
| 292 | MYLK_MOUSE  | Myosin light chain kinase, smooth muscle OS=Mus musculus GN=Mylk PE=1 SV=3                     | 50   | 236379 | 1.2  | 5.92 | 0.927 | 2  | 1.05  |
| 251 | MYL6_MOUSE  | Myosin light polypeptide 6 OS=Mus musculus GN=Myl6 PE=1 SV=3                                   | 64   | 18498  | 13.9 | 4.56 | 0.872 | 2  | 1.08  |
| 28  | MARCS_MOUSE | Myristoylated alanine-rich C-kinase substrate OS=Mus musculus GN=Marcks PE=1 SV=2              | 534  | 33148  | 21.7 | 4.34 | 0.963 | 12 | 1.042 |
| 224 | DDAH1_MOUSE | N(G),N(G)-dimethylarginine dimethylaminohydrolase 1 OS=Mus musculus GN=Ddah1 PE=1 SV=3         | 77   | 34421  | 3.5  | 5.64 | 0.962 | 2  | 1.108 |
| 227 | NHRF2_MOUSE | Na(+)/H(+) exchange regulatory cofactor NHE-RF2 OS=Mus musculus GN=Slc9a3r2 PE=1 SV=2          | 77   | 39817  | 8.3  | 7.23 | 1.087 | 3  | 1.009 |
| 169 | YBOX1_MOUSE | Nuclease-sensitive element-binding protein 1 OS=Mus musculus GN=Ybx1 PE=1 SV=3                 | 104  | 38158  | 13   | 9.87 | 0.951 | 2  | 1.183 |
| 135 | NUCL_MOUSE  | Nucleolin OS=Mus musculus GN=Ncl PE=1 SV=2                                                     | 137  | 89836  | 7.6  | 4.69 | 1.076 | 5  | 1.066 |
| 104 | NPM_MOUSE   | Nucleophosmin OS=Mus musculus GN=Npm1 PE=1 SV=1                                                | 195  | 37577  | 14.7 | 4.62 | 1.084 | 7  | 1.047 |
| 92  | NDKB_MOUSE  | Nucleoside diphosphate kinase B OS=Mus musculus GN=Nme2 PE=1 SV=1                              | 215  | 19317  | 25.7 | 6.97 | 0.901 | 7  | 1.035 |
| 106 | PTMS_MOUSE  | Parathyrosin OS=Mus musculus GN=Ptms PE=1 SV=3                                                 | 188  | 13441  | 21.8 | 4.17 | 0.973 | 3  | 1.039 |

|     |             |                                                                                |     |        |      |      |       |    |         |
|-----|-------------|--------------------------------------------------------------------------------|-----|--------|------|------|-------|----|---------|
| 71  | PPIA_MOUSE  | Peptidyl-prolyl cis-trans isomerase A OS=Mus musculus GN=Ppia PE=1 SV=2        | 279 | 20115  | 38.4 | 7.74 | 1.072 | 11 | 1.044   |
| 152 | FKB1A_MOUSE | Peptidyl-prolyl cis-trans isomerase FKBP1A OS=Mus musculus GN=Fkbp1a PE=1 SV=2 | 121 | 13258  | 16.7 | 7.88 | 0.897 | 4  | 1.017   |
| 103 | PRDX1_MOUSE | Peroxiredoxin-1 OS=Mus musculus GN=Prdx1 PE=1 SV=1                             | 199 | 25228  | 23.6 | 8.26 | 0.984 | 8  | 1.038   |
| 50  | PRDX2_MOUSE | Peroxiredoxin-2 OS=Mus musculus GN=Prdx2 PE=1 SV=3                             | 367 | 23920  | 31.8 | 5.2  | 0.972 | 13 | 1.041   |
| 182 | PRDX4_MOUSE | Peroxiredoxin-4 OS=Mus musculus GN=Prdx4 PE=1 SV=1                             | 95  | 33667  | 6.9  | 6.67 | 0.94  | 3  | [1.088] |
| 153 | PRDX5_MOUSE | Peroxiredoxin-5, mitochondrial OS=Mus musculus GN=Prdx5 PE=1 SV=2              | 121 | 24465  | 18.1 | 9.1  | 0.89  | 4  | 1.052   |
| 15  | PRDX6_MOUSE | Peroxiredoxin-6 OS=Mus musculus GN=Prdx6 PE=1 SV=3                             | 804 | 27685  | 71.4 | 5.71 | 1.04  | 29 | 1.03    |
| 131 | PEBP1_MOUSE | Phosphatidylethanolamine-binding protein 1 OS=Mus musculus GN=Pebp1 PE=1 SV=3  | 145 | 22829  | 11.2 | 5.19 | 0.907 | 3  | 1.04    |
| 128 | PGK1_MOUSE  | Phosphoglycerate kinase 1 OS=Mus musculus GN=Pgk1 PE=1 SV=4                    | 149 | 50896  | 11   | 8.02 | 0.962 | 7  | 1.053   |
| 91  | PGAM1_MOUSE | Phosphoglycerate mutase 1 OS=Mus musculus GN=Pgam1 PE=1 SV=3                   | 217 | 31644  | 16.5 | 6.67 | 0.892 | 7  | 1.034   |
| 165 | PLST_MOUSE  | Plastin-3 OS=Mus musculus GN=Pls3 PE=1 SV=3                                    | 107 | 78460  | 5.2  | 5.42 | 0.946 | 4  | 1.118   |
| 271 | CD36_MOUSE  | Platelet glycoprotein 4 OS=Mus musculus GN=Cd36 PE=1 SV=2                      | 57  | 58600  | 4.4  | 8.6  | 0.899 | 2  | 1.007   |
| 257 | PCBP1_MOUSE | Poly(rC)-binding protein 1 OS=Mus musculus GN=Pcbp1 PE=1 SV=1                  | 63  | 40049  | 5.3  | 6.66 | 0.95  | 2  | 1.057   |
| 17  | PTRF_MOUSE  | Polymerase I and transcript release factor OS=Mus musculus GN=Ptrf PE=1 SV=1   | 690 | 49691  | 28.3 | 5.43 | 0.794 | 17 | 1.04    |
| 167 | LMNA_MOUSE  | Prelamin-A/C OS=Mus musculus GN=Lmna PE=1 SV=2                                 | 106 | 80187  | 3.3  | 6.54 | 1.134 | 2  | 1.002   |
| 25  | PROF1_MOUSE | Profilin-1 OS=Mus musculus GN=Pfn1 PE=1 SV=2                                   | 569 | 16526  | 52.9 | 8.46 | 0.921 | 20 | 1.044   |
| 183 | PSA1_MOUSE  | Proteasome subunit alpha type-1 OS=Mus musculus GN=Psm1 PE=1 SV=1              | 95  | 31631  | 8.7  | 6    | 0.824 | 3  | 1.091   |
| 175 | PSA7_MOUSE  | Proteasome subunit alpha type-7 OS=Mus musculus GN=Psm7 PE=1 SV=1              | 101 | 31434  | 8.1  | 8.59 | 0.909 | 3  | 1.02    |
| 200 | PSB7_MOUSE  | Proteasome subunit beta type-7 OS=Mus musculus GN=Psb7 PE=1 SV=1               | 85  | 33030  | 6.9  | 8.14 | 0.928 | 3  | 1.119   |
| 87  | PDIA3_MOUSE | Protein disulfide-isomerase A3 OS=Mus musculus GN=Pdia3 PE=1 SV=2              | 237 | 64504  | 13.7 | 5.88 | 1.008 | 8  | 1.034   |
| 161 | PDIA4_MOUSE | Protein disulfide-isomerase A4 OS=Mus musculus GN=Pdia4 PE=1 SV=3              | 114 | 82012  | 4.9  | 5.16 | 0.969 | 4  | 1.066   |
| 276 | PDIA6_MOUSE | Protein disulfide-isomerase A6 OS=Mus musculus GN=Pdia6 PE=1 SV=3              | 55  | 53292  | 5.2  | 5    | 1.044 | 3  | 1.037   |
| 85  | PDIA1_MOUSE | Protein disulfide-isomerase OS=Mus musculus GN=P4hb PE=1 SV=2                  | 243 | 64694  | 13.4 | 4.77 | 1.029 | 7  | 1.033   |
| 100 | PARK7_MOUSE | Protein DJ-1 OS=Mus musculus GN=Park7 PE=1 SV=1                                | 203 | 22498  | 37   | 6.32 | 0.886 | 7  | 1.062   |
| 198 | S10A6_MOUSE | Protein S100-A6 OS=Mus musculus GN=S100a6 PE=1 SV=3                            | 86  | 11675  | 16.9 | 5.3  | 1.034 | 3  | 1.051   |
| 122 | S10A9_MOUSE | Protein S100-A9 OS=Mus musculus GN=S100a9 PE=1 SV=3                            | 156 | 14907  | 10.6 | 6.64 | 2.09  | 4  | 1.034   |
| 22  | PTMA_MOUSE  | Prothymosin alpha OS=Mus musculus GN=Ptma PE=1 SV=2                            | 597 | 13544  | 23.4 | 3.7  | 1.024 | 16 | 1.037   |
| 42  | KPYM_MOUSE  | Pyruvate kinase PKM OS=Mus musculus GN=Pkm PE=1 SV=4                           | 428 | 63744  | 25.4 | 7.18 | 0.873 | 14 | 1.035   |
| 261 | RABL3_MOUSE | Rab-like protein 3 OS=Mus musculus GN=Rab3 PE=2 SV=1                           | 62  | 28627  | 4.7  | 6.66 | 0.918 | 2  | 1.206   |
| 40  | RADI_MOUSE  | Radixin OS=Mus musculus GN=Rdx PE=1 SV=3                                       | 448 | 77959  | 15.4 | 5.91 | 0.941 | 19 | 1.046   |
| 159 | IQGA1_MOUSE | Ras GTPase-activating-like protein IQGAP1 OS=Mus musculus GN=Iqgap1 PE=1 SV=2  | 115 | 208290 | 2.1  | 6.07 | 0.966 | 5  | 1.083   |
| 181 | RAC1_MOUSE  | Ras-related C3 botulinum toxin substrate 1 OS=Mus musculus GN=Rac1 PE=1 SV=1   | 96  | 24352  | 13   | 8.77 | 1.151 | 2  | 1.107   |

|     |             |                                                                                                                        |     |        |      |      |       |    |         |
|-----|-------------|------------------------------------------------------------------------------------------------------------------------|-----|--------|------|------|-------|----|---------|
| 144 | RAB10_MOUSE | Ras-related protein Rab-10 OS=Mus musculus GN=Rab10 PE=1 SV=1                                                          | 129 | 25881  | 17   | 8.59 | 1.069 | 4  | 1.034   |
| 209 | RB11A_MOUSE | Ras-related protein Rab-11A OS=Mus musculus GN=Rab11a PE=1 SV=3                                                        | 82  | 26344  | 5.1  | 6.12 | 0.918 | 2  | 1.206   |
| 171 | RAB15_MOUSE | Ras-related protein Rab-15 OS=Mus musculus GN=Rab15 PE=1 SV=1                                                          | 103 | 26839  | 10.4 | 5.5  | 1.073 | 3  | 1.046   |
| 101 | RAB1A_MOUSE | Ras-related protein Rab-1A OS=Mus musculus GN=Rab1A PE=1 SV=3                                                          | 199 | 25441  | 25.9 | 5.93 | 0.979 | 6  | 1.076   |
| 117 | RAB1B_MOUSE | Ras-related protein Rab-1B OS=Mus musculus GN=Rab1b PE=1 SV=1                                                          | 162 | 24761  | 21.9 | 5.55 | 1.025 | 5  | 1.037   |
| 172 | RAB35_MOUSE | Ras-related protein Rab-35 OS=Mus musculus GN=Rab35 PE=1 SV=1                                                          | 103 | 25979  | 10.9 | 8.52 | 1.073 | 3  | 1.046   |
| 125 | RAP1B_MOUSE | Ras-related protein Rap-1b OS=Mus musculus GN=Rap1b PE=2 SV=2                                                          | 153 | 23157  | 14.1 | 5.65 | 0.992 | 3  | 1.045   |
| 267 | RRAS2_MOUSE | Ras-related protein R-Ras2 OS=Mus musculus GN=Rras2 PE=1 SV=1                                                          | 59  | 25586  | 5.9  | 5.74 | 1.007 | 2  | 1.084   |
| 280 | RTN3_MOUSE  | Reticulon-3 OS=Mus musculus GN=Rtn3 PE=1 SV=2                                                                          | 54  | 114263 | 1.5  | 4.83 | 0.949 | 2  | 1.175   |
| 31  | AL1A1_MOUSE | Retinal dehydrogenase 1 OS=Mus musculus GN=Aldh1a1 PE=1 SV=5                                                           | 517 | 60847  | 20.8 | 7.92 | 1.014 | 17 | 1.05    |
| 78  | GDIR1_MOUSE | Rho GDP-dissociation inhibitor 1 OS=Mus musculus GN=Arhgdia PE=1 SV=3                                                  | 261 | 26321  | 18.6 | 5.12 | 0.899 | 10 | 1.057   |
| 38  | SBP1_MOUSE  | Selenium-binding protein 1 OS=Mus musculus GN=Selenbp1 PE=1 SV=2                                                       | 448 | 56831  | 25.8 | 5.87 | 0.974 | 16 | 1.022   |
| 269 | SEPT2_MOUSE | Septin-2 OS=Mus musculus GN=Sept2 PE=1 SV=2                                                                            | 57  | 45574  | 2.2  | 6.1  | 0.897 | 2  | 1.041   |
| 264 | SEPT7_MOUSE | Septin-7 OS=Mus musculus GN=Sept7 PE=1 SV=1                                                                            | 60  | 57567  | 2.3  | 8.73 | 0.998 | 2  | 1.104   |
| 18  | SPA3K_MOUSE | Serine protease inhibitor A3K OS=Mus musculus GN=Serpina3k PE=1 SV=2                                                   | 643 | 51311  | 29.4 | 5.05 | 1.132 | 19 | 1.048   |
| 180 | 2AAA_MOUSE  | Serine/threonine-protein phosphatase 2A 65 kDa regulatory subunit A alpha isoform OS=Mus musculus GN=Ppp2r1a PE=1 SV=3 | 98  | 70680  | 3.1  | 5    | 1.077 | 3  | 1.058   |
| 13  | TRFE_MOUSE  | Serotransferrin OS=Mus musculus GN=Tf PE=1 SV=1                                                                        | 890 | 86923  | 30.6 | 6.94 | 0.938 | 34 | 1.04    |
| 140 | SPB6_MOUSE  | Serpin B6 OS=Mus musculus GN=Serpib6 PE=1 SV=1                                                                         | 132 | 47602  | 9    | 5.53 | 0.994 | 4  | [1.042] |
| 46  | SDPR_MOUSE  | Serum deprivation-response protein OS=Mus musculus GN=Sdpr PE=1 SV=3                                                   | 390 | 52113  | 23.7 | 5.15 | 0.872 | 14 | 1.074   |
| 229 | DHSO_MOUSE  | Sorbitol dehydrogenase OS=Mus musculus GN=Sord PE=1 SV=3                                                               | 76  | 42431  | 2.5  | 6.56 | 0.969 | 2  | 1.028   |
| 304 | SORCN_MOUSE | Sorcin OS=Mus musculus GN=Sri PE=1 SV=1                                                                                | 48  | 22852  | 5.6  | 5.32 | 1.19  | 2  | 1.231   |
| 51  | SPTN1_MOUSE | Spectrin alpha chain, non-erythrocytic 1 OS=Mus musculus GN=Sptan1 PE=1 SV=4                                           | 363 | 313742 | 5.1  | 5.2  | 0.998 | 15 | 1.04    |
| 207 | SPTB2_MOUSE | Spectrin beta chain, non-erythrocytic 1 OS=Mus musculus GN=Sptbn1 PE=1 SV=2                                            | 83  | 300825 | 1.3  | 5.4  | 1.029 | 3  | 1.02    |
| 247 | GRP75_MOUSE | Stress-70 protein, mitochondrial OS=Mus musculus GN=Hspa9 PE=1 SV=3                                                    | 66  | 81427  | 4.7  | 5.81 | 0.903 | 3  | 1.05    |
| 214 | SUCA_MOUSE  | Succinyl-CoA ligase [ADP/GDP-forming] subunit alpha, mitochondrial OS=Mus musculus GN=Suclg1 PE=1 SV=4                 | 80  | 39866  | 2.6  | 9.46 | 0.884 | 2  | 1.004   |
| 237 | SAP_MOUSE   | Sulfated glycoprotein 1 OS=Mus musculus GN=Psap PE=1 SV=2                                                              | 70  | 68519  | 1.8  | 5.07 | 1.101 | 2  | 1.034   |
| 45  | SODC_MOUSE  | Superoxide dismutase [Cu-Zn] OS=Mus musculus GN=Sod1 PE=1 SV=2                                                         | 392 | 17512  | 39   | 6.02 | 0.933 | 11 | 1.05    |
| 121 | SODM_MOUSE  | Superoxide dismutase [Mn], mitochondrial OS=Mus musculus GN=Sod2 PE=1 SV=3                                             | 156 | 27221  | 16.2 | 8.8  | 0.885 | 4  | 1.044   |
| 143 | VAT1_MOUSE  | Synaptic vesicle membrane protein VAT-1 homolog OS=Mus musculus GN=Vat1 PE=1 SV=3                                      | 130 | 46135  | 9.9  | 5.95 | 0.869 | 5  | 1.052   |
| 10  | TLN1_MOUSE  | Talin-1 OS=Mus musculus GN=Tln1 PE=1 SV=2                                                                              | 994 | 295033 | 10.8 | 5.84 | 1     | 31 | 1.032   |
| 240 | TADBP_MOUSE | TAR DNA-binding protein 43 OS=Mus musculus GN=Tardbp PE=1 SV=1                                                         | 68  | 48011  | 2.9  | 6.26 | 0.922 | 2  | 1.106   |
| 212 | TCPA_MOUSE  | T-complex protein 1 subunit alpha OS=Mus musculus GN=Tcp1 PE=1 SV=3                                                    | 80  | 66687  | 2.2  | 5.82 | 1.061 | 2  | 1.185   |



|     |             |                                                                                             |      |        |      |      |       |    |         |
|-----|-------------|---------------------------------------------------------------------------------------------|------|--------|------|------|-------|----|---------|
| 211 | TCPG_MOUSE  | T-complex protein 1 subunit gamma OS=Mus musculus GN=Cct3 PE=1 SV=1                         | 81   | 66239  | 1.8  | 6.28 | 0.995 | 3  | 1.041   |
| 174 | TCPQ_MOUSE  | T-complex protein 1 subunit theta OS=Mus musculus GN=Cct8 PE=1 SV=3                         | 102  | 66318  | 3.6  | 5.44 | 0.942 | 3  | 1.07    |
| 255 | TSN8_MOUSE  | Tetraspanin-8 OS=Mus musculus GN=Tspan8 PE=2 SV=1                                           | 63   | 28279  | 4.3  | 5.08 | 0.813 | 2  | 1.107   |
| 97  | THIO_MOUSE  | Thioredoxin OS=Mus musculus GN=Txn PE=1 SV=3                                                | 207  | 13817  | 31.4 | 4.8  | 1.064 | 5  | 1.047   |
| 345 | TYB4_MOUSE  | Thymosin beta-4 OS=Mus musculus GN=Tmsb4x PE=1 SV=1                                         | 39   | 7117   | 26   | 5.02 | 0.934 | 2  | 1.111   |
| 221 | ZO1_MOUSE   | Tight junction protein ZO-1 OS=Mus musculus GN=Tjp1 PE=1 SV=2                               | 78   | 210652 | 1.4  | 6.17 | 0.932 | 3  | 1.096   |
| 90  | TALDO_MOUSE | Transaldolase OS=Mus musculus GN=Taldo1 PE=1 SV=2                                           | 219  | 42257  | 16.6 | 6.57 | 0.866 | 6  | 1.03    |
| 154 | RHOA_MOUSE  | Transforming protein RhoA OS=Mus musculus GN=Rhoa PE=1 SV=1                                 | 121  | 24638  | 23.8 | 5.83 | 1.028 | 5  | 1.125   |
| 79  | TAGL_MOUSE  | Transgelin OS=Mus musculus GN=Tagln PE=1 SV=3                                               | 260  | 25201  | 29.4 | 8.85 | 0.988 | 8  | 1.036   |
| 26  | TAGL2_MOUSE | Transgelin-2 OS=Mus musculus GN=Tagln2 PE=1 SV=4                                            | 554  | 24537  | 50.3 | 8.39 | 1.012 | 19 | 1.043   |
| 82  | TERA_MOUSE  | Transitional endoplasmic reticulum ATPase OS=Mus musculus GN=Vcp PE=1 SV=4                  | 246  | 96734  | 11.8 | 5.14 | 1.094 | 10 | 1.108   |
| 68  | TKT_MOUSE   | Transketolase OS=Mus musculus GN=Tkt PE=1 SV=1                                              | 287  | 74624  | 18.3 | 7.23 | 0.928 | 13 | 1.074   |
| 107 | TPIS_MOUSE  | Triosephosphate isomerase OS=Mus musculus GN=Tpi1 PE=1 SV=4                                 | 186  | 35900  | 24.1 | 5.56 | 0.892 | 8  | 1.024   |
| 142 | TPM1_MOUSE  | Tropomyosin alpha-1 chain OS=Mus musculus GN=Tpm1 PE=1 SV=1                                 | 131  | 38471  | 12.3 | 4.69 | 0.956 | 7  | 1.085   |
| 109 | TPM3_MOUSE  | Tropomyosin alpha-3 chain OS=Mus musculus GN=Tpm3 PE=1 SV=3                                 | 184  | 38640  | 16.8 | 4.68 | 0.954 | 9  | 1.069   |
| 52  | TPM4_MOUSE  | Tropomyosin alpha-4 chain OS=Mus musculus GN=Tpm4 PE=2 SV=3                                 | 355  | 32289  | 28.2 | 4.65 | 0.952 | 12 | 1.041   |
| 57  | TBA1A_MOUSE | Tubulin alpha-1A chain OS=Mus musculus GN=Tuba1a PE=1 SV=1                                  | 328  | 53538  | 18.2 | 4.94 | 1.1   | 11 | 1.058   |
| 130 | TBB4B_MOUSE | Tubulin beta-4B chain OS=Mus musculus GN=Tubb4b PE=1 SV=1                                   | 146  | 52473  | 15.1 | 4.79 | 1.047 | 6  | 1.19    |
| 132 | TBB5_MOUSE  | Tubulin beta-5 chain OS=Mus musculus GN=Tubb5 PE=1 SV=1                                     | 144  | 52313  | 18.5 | 4.78 | 1.113 | 5  | 1.067   |
| 137 | TPPP3_MOUSE | Tubulin polymerization-promoting protein family member 3 OS=Mus musculus GN=Tppp3 PE=1 SV=1 | 135  | 23127  | 17   | 9.18 | 0.876 | 4  | [1.052] |
| 73  | RS27A_MOUSE | Ubiquitin-40S ribosomal protein S27a OS=Mus musculus GN=Rps27a PE=1 SV=2                    | 273  | 21962  | 25.6 | 9.68 | 1.061 | 10 | 1.046   |
| 202 | UB2L3_MOUSE | Ubiquitin-conjugating enzyme E2 L3 OS=Mus musculus GN=Ube2l3 PE=2 SV=1                      | 84   | 20726  | 5.8  | 8.68 | 1.046 | 2  | 1.068   |
| 197 | UBE2N_MOUSE | Ubiquitin-conjugating enzyme E2 N OS=Mus musculus GN=Ube2n PE=1 SV=1                        | 88   | 18614  | 7.2  | 6.13 | 0.972 | 2  | 1.043   |
| 231 | UBA1_MOUSE  | Ubiquitin-like modifier-activating enzyme 1 OS=Mus musculus GN=Uba1 PE=1 SV=1               | 74   | 126625 | 1.5  | 5.43 | 0.965 | 3  | 1.096   |
| 76  | UTER_MOUSE  | Uteroglobin OS=Mus musculus GN=Scgb1a1 PE=1 SV=1                                            | 265  | 11705  | 19.8 | 6.15 | 0.747 | 7  | 1.047   |
| 33  | VIME_MOUSE  | Vimentin OS=Mus musculus GN=Vim PE=1 SV=3                                                   | 509  | 57015  | 31.1 | 5.06 | 1.155 | 18 | 1.068   |
| 6   | VINC_MOUSE  | Vinculin OS=Mus musculus GN=Vcl PE=1 SV=4                                                   | 1612 | 128056 | 37.4 | 5.77 | 0.946 | 59 | [1.025] |
