# Supplementary material
Source: publisher site journal article supplement (https://www.dovepress.com/article/82979)
Supplement: Supplementary file 2 [file get_supplementary_file.php]

| Protein hit no. | Accession no. | Protein description                                                                                  | Protein scor |
|-----------------|---------------|------------------------------------------------------------------------------------------------------|--------------|
| 149             | CH10_MOUSE    | 10 kDa heat shock protein, mitochondrial OS=Mus musculus<br>GN=Hspe1 PE=1 SV=2                       | 57           |
| 43              | 1433B_MOUSE   | 14-3-3 protein beta/alpha OS=Mus musculus GN=Ywhab PE=1<br>SV=3                                      | 189          |
| 39              | 1433E_MOUSE   | 14-3-3 protein epsilon OS=Mus musculus GN=Ywhae PE=1<br>SV=1                                         | 193          |
| 52              | 1433F_MOUSE   | 14-3-3 protein eta OS=Mus musculus GN=Ywhah PE=1 SV=2                                                | 155          |
| 40              | 1433G_MOUSE   | 14-3-3 protein gamma OS=Mus musculus GN=Ywhag PE=1<br>SV=2                                           | 193          |
| 60              | 1433S_MOUSE   | 14-3-3 protein sigma OS=Mus musculus GN=Sfn PE=1 SV=2                                                | 127          |
| 22              | 1433Z_MOUSE   | 14-3-3 protein zeta/delta OS=Mus musculus GN=Ywhaz PE=1<br>SV=1                                      | 279          |
| 79              | RS19_MOUSE    | 40S ribosomal protein S19 OS=Mus musculus GN=Rps19 PE=1<br>SV=3                                      | 104          |
| 152             | RLA0_MOUSE    | 60S acidic ribosomal protein P0 OS=Mus musculus GN=Rplp0<br>PE=1 SV=3                                | 56           |
| 48              | GRP78_MOUSE   | 78 kDa glucose-regulated protein OS=Mus musculus<br>GN=Hspa5 PE=1 SV=3                               | 167          |
| 96              | AN32A_MOUSE   | Acidic leucine-rich nuclear phosphoprotein 32 family member A<br>OS=Mus musculus GN=Anp32a PE=1 SV=1 | 82           |
| 6               | ACTB_MOUSE    | Actin, cytoplasmic 1 OS=Mus musculus GN=Actb PE=1 SV=1                                               | 835          |
| 108             | CAP1_MOUSE    | Adenylyl cyclase-associated protein 1 OS=Mus musculus<br>GN=Cap1 PE=1 SV=4                           | 75           |
| 147             | ARF1_MOUSE    | ADP-ribosylation factor 1 OS=Mus musculus GN=Arf1 PE=1<br>SV=2                                       | 57           |
| 51              | RAGE_MOUSE    | Advanced glycosylation end product-specific receptor OS=Mus<br>musculus GN=Ager PE=1 SV=1            | 157          |
| 65              | AL1A7_MOUSE   | Aldehyde dehydrogenase, cytosolic 1 OS=Mus musculus<br>GN=Aldh1a7 PE=2 SV=1                          | 119          |
| 89              | ALDH2_MOUSE   | Aldehyde dehydrogenase, mitochondrial OS=Mus musculus<br>GN=Aldh2 PE=1 SV=1                          | 90           |
| 86              | ALDR_MOUSE    | Aldose reductase OS=Mus musculus GN=Akr1b1 PE=1 SV=3                                                 | 92           |
| 82              | A1AT2_MOUSE   | Alpha-1-antitrypsin 1-2 OS=Mus musculus GN=Serpina1b PE=1<br>SV=2                                    | 95           |
| 49              | A1AT3_MOUSE   | Alpha-1-antitrypsin 1-3 OS=Mus musculus GN=Serpina1c PE=1<br>SV=2                                    | 163          |
| 83              | A1AT4_MOUSE   | Alpha-1-antitrypsin 1-4 OS=Mus musculus GN=Serpina1d PE=2<br>SV=1                                    | 95           |
| 106             | FETUA_MOUSE   | Alpha-2-HS-glycoprotein OS=Mus musculus GN=Ahsg PE=1<br>SV=1                                         | 76           |
| 15              | A2M_MOUSE     | Alpha-2-macroglobulin OS=Mus musculus GN=A2m PE=1 SV=3                                               | 355          |

|     |                   |                                                                             |      |
|-----|-------------------|-----------------------------------------------------------------------------|------|
| 159 | ACTN4_MOUSE<br>E  | Alpha-actinin-4 OS=Mus musculus GN=Actn4 PE=1 SV=1                          | 52   |
| 24  | ENOA_MOUSE        | Alpha-enolase OS=Mus musculus GN=Eno1 PE=1 SV=3                             | 243  |
| 121 | ACE_MOUSE         | Angiotensin-converting enzyme OS=Mus musculus GN=Ace PE=1 SV=3              | 67   |
| 131 | ANXA2_MOUSE<br>E  | Annexin A2 OS=Mus musculus GN=Anxa2 PE=1 SV=2                               | 64   |
| 37  | ANXA5_MOUSE<br>E  | Annexin A5 OS=Mus musculus GN=Anxa5 PE=1 SV=1                               | 198  |
| 36  | APOA1_MOUSE<br>E  | Apolipoprotein A-I OS=Mus musculus GN=Apoa1 PE=1 SV=2                       | 202  |
| 130 | BCAM_MOUSE<br>E   | Basal cell adhesion molecule OS=Mus musculus GN=Bcam PE=2 SV=1              | 64   |
| 20  | ACTBL_MOUSE<br>E  | Beta-actin-like protein 2 OS=Mus musculus GN=Actbl2 PE=1 SV=1               | 300  |
| 104 | ENOB_MOUSE        | Beta-enolase OS=Mus musculus GN=Eno3 PE=1 SV=3                              | 77   |
| 66  | CALM_MOUSE        | Calmodulin OS=Mus musculus GN=Calm1 PE=1 SV=2                               | 119  |
| 132 | CALX_MOUSE        | Calnexin OS=Mus musculus GN=Canx PE=1 SV=1                                  | 63   |
| 54  | CALR_MOUSE        | Calreticulin OS=Mus musculus GN=Calr PE=1 SV=1                              | 146  |
| 28  | CAH2_MOUSE        | Carbonic anhydrase 2 OS=Mus musculus GN=Ca2 PE=1 SV=4                       | 232  |
| 163 | CAH3_MOUSE        | Carbonic anhydrase 3 OS=Mus musculus GN=Ca3 PE=1 SV=3                       | 49   |
| 5   | CBR2_MOUSE        | Carbonyl reductase [NADPH] 2 OS=Mus musculus GN=Cbr2 PE=1 SV=1              | 1255 |
| 44  | EST1C_MOUSE<br>E  | Carboxylesterase 1C OS=Mus musculus GN=Ces1c PE=1 SV=4                      | 189  |
| 33  | CES1D_MOUSE<br>E  | Carboxylesterase 1D OS=Mus musculus GN=Ces1d PE=1 SV=1                      | 211  |
| 129 | CATA_MOUSE        | Catalase OS=Mus musculus GN=Cat PE=1 SV=4                                   | 64   |
| 94  | CDC42_MOUSE<br>E  | Cell division control protein 42 homolog OS=Mus musculus GN=Cdc42 PE=1 SV=2 | 83   |
| 157 | CLIC5_MOUSE       | Chloride intracellular channel protein 5 OS=Mus musculus GN=Clic5 PE=1 SV=1 | 54   |
| 110 | CISY_MOUSE        | Citrate synthase, mitochondrial OS=Mus musculus GN=Cs PE=1 SV=1             | 73   |
| 155 | COF1_MOUSE        | Cofilin-1 OS=Mus musculus GN=Cfl1 PE=1 SV=3                                 | 56   |
| 67  | CO3_MOUSE         | Complement C3 OS=Mus musculus GN=C3 PE=1 SV=3                               | 119  |
| 190 | COR1C_MOUSE<br>SE | Coronin-1C OS=Mus musculus GN=Coro1c PE=1 SV=2                              | 41   |
| 141 | KCRM_MOUSE<br>E   | Creatine kinase M-type OS=Mus musculus GN=Ckm PE=1 SV=1                     | 58   |

|     |                  |                                                                             |      |
|-----|------------------|-----------------------------------------------------------------------------|------|
| 100 | CRIP2_MOUSE<br>E | Cysteine-rich protein 2 OS=Mus musculus GN=Crip2 PE=1 SV=1                  | 79   |
| 71  | CYC_MOUSE        | Cytochrome c, somatic OS=Mus musculus GN=Cyccs PE=1 SV=2                    | 117  |
| 27  | DPYL2_MOUSE<br>E | Dihydropyrimidinase-related protein 2 OS=Mus musculus GN=Dpysl2 PE=1 SV=2   | 233  |
| 93  | EHD2_MOUSE       | EH domain-containing protein 2 OS=Mus musculus GN=Ehd2 PE=1 SV=1            | 85   |
| 127 | EF1A1_MOUSE<br>E | Elongation factor 1-alpha 1 OS=Mus musculus GN=Eef1a1 PE=1 SV=3             | 65   |
| 165 | EF1B_MOUSE       | Elongation factor 1-beta OS=Mus musculus GN=Eef1b PE=1 SV=5                 | 49   |
| 103 | ENPL_MOUSE       | Endoplasmic reticulum protein OS=Mus musculus GN=Hsp90b1 PE=1 SV=2          | 78   |
| 119 | FABPH_MOUSE<br>E | Fatty acid-binding protein, heart OS=Mus musculus GN=Fabp3 PE=1 SV=5        | 67   |
| 35  | FLNA_MOUSE       | Filamin-A OS=Mus musculus GN=Flna PE=1 SV=5                                 | 206  |
| 38  | ALDOA_MOUSE<br>E | Fructose-bisphosphate aldolase A OS=Mus musculus GN=Aldoa PE=1 SV=2         | 197  |
| 135 | GELS_MOUSE       | Gelsolin OS=Mus musculus GN=Gsn PE=1 SV=3                                   | 61   |
| 50  | GSTA3_MOUSE<br>E | Glutathione S-transferase A3 OS=Mus musculus GN=Gsta3 PE=1 SV=2             | 158  |
| 140 | GSTA4_MOUSE<br>E | Glutathione S-transferase A4 OS=Mus musculus GN=Gsta4 PE=1 SV=3             | 58   |
| 30  | GSTM1_MOUSE<br>E | Glutathione S-transferase Mu 1 OS=Mus musculus GN=Gstm1 PE=1 SV=2           | 231  |
| 42  | GSTM2_MOUSE<br>E | Glutathione S-transferase Mu 2 OS=Mus musculus GN=Gstm2 PE=1 SV=2           | 190  |
| 47  | GSTM4_MOUSE<br>E | Glutathione S-transferase Mu 3 OS=Mus musculus GN=Gstm3 PE=1 SV=2           | 168  |
| 73  | G3P_MOUSE        | Glyceraldehyde-3-phosphate dehydrogenase OS=Mus musculus GN=Gapdh PE=1 SV=2 | 115  |
| 117 | GIMA4_MOUSE<br>E | GTPase IMAP family member 4 OS=Mus musculus GN=Gimap4 PE=1 SV=1             | 69   |
| 13  | HSP7C_MOUSE<br>E | Heat shock cognate 71 kDa protein OS=Mus musculus GN=Hspa8 PE=1 SV=1        | 388  |
| 31  | HS90A_MOUSE<br>E | Heat shock protein HSP 90-alpha OS=Mus musculus GN=Hsp90aa1 PE=1 SV=4       | 223  |
| 26  | HS90B_MOUSE<br>E | Heat shock protein HSP 90-beta OS=Mus musculus GN=Hsp90ab1 PE=1 SV=3        | 237  |
| 3   | HBA_MOUSE        | Hemoglobin subunit alpha OS=Mus musculus GN=Hba PE=1 SV=2                   | 5628 |
| 1   | HBB1_MOUSE       | Hemoglobin subunit beta-1 OS=Mus musculus GN=Hbb-b1 PE=1 SV=2               | 9233 |
| 2   | HBB2_MOUSE       | Hemoglobin subunit beta-2 OS=Mus musculus GN=Hbb-b2 PE=1 SV=2               | 6521 |
| 173 | HEMO_MOUSE<br>E  | Hemopexin OS=Mus musculus GN=Hpx PE=1 SV=2                                  | 47   |

|     |                   |                                                                                          |     |
|-----|-------------------|------------------------------------------------------------------------------------------|-----|
| 113 | ROA0_MOUSE        | Heterogeneous nuclear ribonucleoprotein A0 OS=Mus musculus<br>GN=Hnrnpa0 PE=1 SV=1       | 70  |
| 114 | ROA1_MOUSE        | Heterogeneous nuclear ribonucleoprotein A1 OS=Mus musculus<br>GN=Hnrnpa1 PE=1 SV=2       | 70  |
| 115 | ROA2_MOUSE        | Heterogeneous nuclear ribonucleoproteins A2/B1 OS=Mus<br>musculus GN=Hnrnpa2b1 PE=1 SV=2 | 70  |
| 18  | INMT_MOUSE        | Indolethylamine N-methyltransferase OS=Mus musculus<br>GN=Inmt PE=1 SV=1                 | 328 |
| 87  | K1C18_MOUSE<br>E  | Keratin, type I cytoskeletal 18 OS=Mus musculus GN=Krt18<br>PE=1 SV=5                    | 90  |
| 80  | K2C1_MOUSE        | Keratin, type II cytoskeletal 1 OS=Mus musculus GN=Krt1 PE=1<br>SV=4                     | 104 |
| 58  | K2C1B_MOUSE<br>E  | Keratin, type II cytoskeletal 1b OS=Mus musculus GN=Krt77<br>PE=1 SV=1                   | 136 |
| 125 | K22O_MOUSE        | Keratin, type II cytoskeletal 2 oral OS=Mus musculus GN=Krt76<br>PE=2 SV=1               | 66  |
| 46  | K2C5_MOUSE        | Keratin, type II cytoskeletal 5 OS=Mus musculus GN=Krt5 PE=1<br>SV=1                     | 176 |
| 116 | K2C8_MOUSE        | Keratin, type II cytoskeletal 8 OS=Mus musculus GN=Krt8 PE=1<br>SV=4                     | 70  |
| 74  | KNG1_MOUSE        | Kininogen-1 OS=Mus musculus GN=Kng1 PE=1 SV=1                                            | 114 |
| 19  | MDHM_MOUSE<br>E   | Malate dehydrogenase, mitochondrial OS=Mus musculus<br>GN=Mdh2 PE=1 SV=3                 | 301 |
| 9   | MOES_MOUSE<br>E   | Moesin OS=Mus musculus GN=Msn PE=1 SV=3                                                  | 646 |
| 45  | MYG_MOUSE         | Myoglobin OS=Mus musculus GN=Mb PE=1 SV=3                                                | 178 |
| 185 | MYLK_MOUSE        | Myosin light chain kinase, smooth muscle OS=Mus musculus<br>GN=Myk PE=1 SV=3             | 43  |
| 68  | MARCS_MOUSE<br>SE | Myristoylated alanine-rich C-kinase substrate OS=Mus<br>musculus GN=Marcks PE=1 SV=2     | 118 |
| 69  | HMG2_MOUSE<br>SE  | Non-histone chromosomal protein HMG-17 OS=Mus musculus<br>GN=Hmgn2 PE=1 SV=2             | 117 |
| 97  | NPM_MOUSE         | Nucleophosmin OS=Mus musculus GN=Npm1 PE=1 SV=1                                          | 82  |
| 122 | NDKA_MOUSE        | Nucleoside diphosphate kinase A OS=Mus musculus GN=Nme1<br>PE=1 SV=1                     | 66  |
| 105 | NDKB_MOUSE        | Nucleoside diphosphate kinase B OS=Mus musculus GN=Nme2<br>PE=1 SV=1                     | 76  |
| 75  | PTMS_MOUSE        | Parathyrosin OS=Mus musculus GN=Ptms PE=1 SV=3                                           | 112 |
| 78  | PRDX1_MOUSE<br>E  | Peroxiredoxin-1 OS=Mus musculus GN=Prdx1 PE=1 SV=1                                       | 110 |
| 29  | PRDX2_MOUSE<br>E  | Peroxiredoxin-2 OS=Mus musculus GN=Prdx2 PE=1 SV=3                                       | 232 |
| 10  | PRDX6_MOUSE<br>E  | Peroxiredoxin-6 OS=Mus musculus GN=Prdx6 PE=1 SV=3                                       | 549 |
| 91  | PEBP1_MOUSE<br>E  | Phosphatidylethanolamine-binding protein 1 OS=Mus musculus<br>GN=Pebp1 PE=1 SV=3         | 85  |

|     |                   |                                                                                 |     |
|-----|-------------------|---------------------------------------------------------------------------------|-----|
| 77  | PGAM1_MOUSE<br>E  | Phosphoglycerate mutase 1 OS=Mus musculus GN=Pgam1<br>PE=1 SV=3                 | 110 |
| 95  | PLST_MOUSE        | Plastin-3 OS=Mus musculus GN=Pls3 PE=1 SV=3                                     | 82  |
| 32  | PTRF_MOUSE        | Polymerase I and transcript release factor OS=Mus musculus<br>GN=Ptrf PE=1 SV=1 | 216 |
| 133 | LMNA_MOUSE        | Prelamin-A/C OS=Mus musculus GN=Lmna PE=1 SV=2                                  | 63  |
| 34  | PROF1_MOUSE<br>E  | Profilin-1 OS=Mus musculus GN=Pfn1 PE=1 SV=2                                    | 210 |
| 138 | SAP_MOUSE         | Prosaposin OS=Mus musculus GN=Psap PE=1 SV=2                                    | 60  |
| 109 | PDIA3_MOUSE<br>E  | Protein disulfide-isomerase A3 OS=Mus musculus GN=Pdia3<br>PE=1 SV=2            | 74  |
| 70  | PDIA1_MOUSE<br>E  | Protein disulfide-isomerase OS=Mus musculus GN=P4hb PE=1<br>SV=2                | 117 |
| 90  | S10A6_MOUSE<br>E  | Protein S100-A6 OS=Mus musculus GN=S100a6 PE=1 SV=3                             | 87  |
| 99  | PTMA_MOUSE        | Prothymosin alpha OS=Mus musculus GN=Ptma PE=1 SV=2                             | 80  |
| 63  | KPYM_MOUSE        | Pyruvate kinase PKM OS=Mus musculus GN=Pkm PE=1 SV=4                            | 122 |
| 84  | RAB1A_MOUSE<br>E  | Ras-related protein Rab-1A OS=Mus musculus GN=Rab1A<br>PE=1 SV=3                | 92  |
| 92  | RAB1B_MOUSE<br>E  | Ras-related protein Rab-1B OS=Mus musculus GN=Rab1b<br>PE=1 SV=1                | 85  |
| 16  | AL1A1_MOUSE<br>E  | Retinal dehydrogenase 1 OS=Mus musculus GN=Aldh1a1 PE=1<br>SV=5                 | 341 |
| 61  | GDIR1_MOUSE<br>E  | Rho GDP-dissociation inhibitor 1 OS=Mus musculus<br>GN=Arhgdia PE=1 SV=3        | 126 |
| 14  | SBP1_MOUSE        | Selenium-binding protein 1 OS=Mus musculus GN=Selenbp1<br>PE=1 SV=2             | 373 |
| 11  | SPA3K_MOUSE<br>E  | Serine protease inhibitor A3K OS=Mus musculus GN=Serpina3k<br>PE=1 SV=2         | 422 |
| 8   | TRFE_MOUSE        | Serotransferrin OS=Mus musculus GN=Tf PE=1 SV=1                                 | 759 |
| 85  | SDPR_MOUSE        | Serum deprivation-response protein OS=Mus musculus<br>GN=Sdpr PE=1 SV=3         | 92  |
| 143 | SUMO2_MOUSE<br>SE | Small ubiquitin-related modifier 2 OS=Mus musculus<br>GN=Sumo2 PE=1 SV=1        | 58  |
| 55  | SPTN1_MOUSE<br>E  | Spectrin alpha chain, non-erythrocytic 1 OS=Mus musculus<br>GN=Sptan1 PE=1 SV=4 | 142 |
| 111 | SPTB2_MOUSE<br>E  | Spectrin beta chain, non-erythrocytic 1 OS=Mus musculus<br>GN=Sptbn1 PE=1 SV=2  | 72  |
| 128 | GRP75_MOUSE<br>E  | Stress-70 protein, mitochondrial OS=Mus musculus GN=Hspa9<br>PE=1 SV=3          | 65  |
| 12  | SODC_MOUSE<br>E   | Superoxide dismutase [Cu-Zn] OS=Mus musculus GN=Sod1<br>PE=1 SV=2               | 397 |
| 64  | SODM_MOUSE<br>E   | Superoxide dismutase [Mn], mitochondrial OS=Mus musculus<br>GN=Sod2 PE=1 SV=3   | 120 |

|     |                  |                                                                                                |     |
|-----|------------------|------------------------------------------------------------------------------------------------|-----|
| 17  | TLN1_MOUSE       | Talin-1 OS=Mus musculus GN=Tln1 PE=1 SV=2                                                      | 336 |
| 107 | THIO_MOUSE       | Thioredoxin OS=Mus musculus GN=Txn PE=1 SV=3                                                   | 75  |
| 153 | TYB4_MOUSE       | Thymosin beta-4 OS=Mus musculus GN=Tmsb4x PE=1 SV=1                                            | 56  |
| 81  | TALDO_MOUSE<br>E | Transaldolase OS=Mus musculus GN=Taldo1 PE=1 SV=2                                              | 100 |
| 41  | TAGL_MOUSE       | Transgelin OS=Mus musculus GN=Tagln PE=1 SV=3                                                  | 191 |
| 21  | TAGL2_MOUSE<br>E | Transgelin-2 OS=Mus musculus GN=Tagln2 PE=1 SV=4                                               | 293 |
| 123 | TERA_MOUSE       | Transitional endoplasmic reticulum ATPase OS=Mus musculus<br>GN=Vcp PE=1 SV=4                  | 66  |
| 76  | TKT_MOUSE        | Transketolase OS=Mus musculus GN=Tkt PE=1 SV=1                                                 | 112 |
| 59  | TPIS_MOUSE       | Triosephosphate isomerase OS=Mus musculus GN=Tpi1 PE=1<br>SV=4                                 | 127 |
| 101 | TPM1_MOUSE       | Tropomyosin alpha-1 chain OS=Mus musculus GN=Tpm1 PE=1<br>SV=1                                 | 79  |
| 57  | TPM3_MOUSE       | Tropomyosin alpha-3 chain OS=Mus musculus GN=Tpm3 PE=1<br>SV=3                                 | 136 |
| 53  | TPM4_MOUSE       | Tropomyosin alpha-4 chain OS=Mus musculus GN=Tpm4 PE=2<br>SV=3                                 | 147 |
| 148 | TBA1A_MOUSE<br>E | Tubulin alpha-1A chain OS=Mus musculus GN=Tuba1a PE=1<br>SV=1                                  | 57  |
| 62  | TPPP3_MOUSE<br>E | Tubulin polymerization-promoting protein family member 3<br>OS=Mus musculus GN=Tppp3 PE=1 SV=1 | 123 |
| 25  | RS27A_MOUSE<br>E | Ubiquitin-40S ribosomal protein S27a OS=Mus musculus<br>GN=Rps27a PE=1 SV=2                    | 238 |
| 23  | UTER_MOUSE       | Uteroglobin OS=Mus musculus GN=Scgb1a1 PE=1 SV=1                                               | 269 |
| 56  | VIME_MOUSE       | Vimentin OS=Mus musculus GN=Vim PE=1 SV=3                                                      | 139 |
| 7   | VINC_MOUSE       | Vinculin OS=Mus musculus GN=Vcl PE=1 SV=4                                                      | 796 |

| MW [kDa] | Sequence covered % | Protein PI | 115/114 ratio (znop) | N  | SD      |
|----------|--------------------|------------|----------------------|----|---------|
| 12685    | 19.6               | 7.93       | 0.792                | 2  | 1.003   |
| 31187    | 22.4               | 4.77       | 1.07                 | 6  | 1.101   |
| 32031    | 18.8               | 4.63       | 0.962                | 6  | 1.039   |
| 31358    | 16.3               | 4.81       | 1.065                | 7  | [1.065] |
| 31017    | 20.2               | 4.8        | 1.042                | 8  | [1.055] |
| 30519    | 8.5                | 4.72       | 1.091                | 5  | 1.081   |
| 30918    | 30.2               | 4.73       | 1.045                | 7  | 1.099   |
| 18381    | 13.8               | 10.41      | 1.058                | 2  | 1.029   |
| 37215    | 3.5                | 5.91       | 1.016                | 2  | 1.003   |
| 81404    | 9.9                | 5.07       | 1.027                | 8  | 1.059   |
| 31540    | 10.9               | 3.99       | 0.979                | 3  | 1.055   |
| 44868    | 36.3               | 5.29       | 1.425                | 20 | 1.063   |
| 57717    | 6.8                | 7.16       | 0.908                | 3  | 1.043   |
| 22459    | 14.4               | 6.32       | 1.248                | 2  | 1.129   |
| 45224    | 10.2               | 5.78       | 0.943                | 6  | [1.027] |
| 60397    | 8.6                | 7.6        | 1.019                | 4  | 1.113   |
| 61383    | 5.6                | 7.53       | 1.123                | 4  | 1.13    |
| 39876    | 10.8               | 6.71       | 0.885                | 2  | 1.058   |
| 49974    | 8.2                | 5.32       | 1.078                | 3  | 1.191   |
| 49535    | 10.7               | 5.25       | 1.072                | 5  | 1.192   |
| 49710    | 8.2                | 5.24       | 1.078                | 3  | 1.191   |
| 40107    | 14.2               | 6.04       | 1.012                | 3  | 1.088   |
| 180541   | 8.5                | 6.24       | 0.879                | 12 | [1.081] |

|        |      |      |       |    |         |
|--------|------|------|-------|----|---------|
| 113493 | 2.9  | 5.25 | 0.881 | 2  | 1.096   |
| 52431  | 18.9 | 6.37 | 0.799 | 10 | 1.08    |
| 160446 | 2.1  | 6.1  | 0.905 | 3  | 1.063   |
| 43781  | 5    | 7.55 | 1.231 | 2  | 1.53    |
| 38946  | 26.6 | 4.83 | 0.999 | 4  | 1.035   |
| 33479  | 16.3 | 5.51 | 1.095 | 3  | 1.068   |
| 71153  | 5.1  | 5.85 | 1.022 | 2  | 1.054   |
| 44991  | 15.7 | 5.3  | 1.462 | 11 | 1.084   |
| 52747  | 8.1  | 6.73 | 0.594 | 4  | 1.077   |
| 18124  | 18.8 | 4.09 | 0.673 | 4  | 1.233   |
| 76060  | 1.7  | 4.5  | 1.071 | 2  | 1.031   |
| 54443  | 12   | 4.33 | 0.936 | 6  | [1.095] |
| 31989  | 38.1 | 6.49 | 0.863 | 5  | 1.139   |
| 32460  | 4.6  | 6.89 | 0.375 | 2  | 1.533   |
| 28339  | 70.5 | 9.1  | 1.128 | 29 | 1.062   |
| 65138  | 10.3 | 4.97 | 0.868 | 6  | 1.077   |
| 67022  | 14   | 6.17 | 0.882 | 9  | 1.059   |
| 64743  | 4    | 7.72 | 0.967 | 3  | 1.091   |
| 24115  | 9.9  | 6.15 | 1.046 | 2  | 1.007   |
| 31578  | 7.2  | 5.64 | 1.42  | 2  | 1.105   |
| 55968  | 6.9  | 8.72 | 0.891 | 2  | 1.005   |
| 22478  | 8.4  | 8.22 | 1.008 | 2  | 1.139   |
| 204900 | 3.2  | 6.29 | 1.033 | 4  | 1.085   |
| 58971  | 4.2  | 6.65 | 0.939 | 2  | 1.098   |
| 48101  | 4.7  | 6.58 | 0.578 | 2  | 1.017   |



|        |      |      |       |     |         |
|--------|------|------|-------|-----|---------|
| 26670  | 9.1  | 8.94 | 1.497 | 3   | [1.091] |
| 14428  | 28.6 | 9.61 | 0.708 | 4   | 1.093   |
| 67316  | 15   | 5.95 | 1.06  | 4   | [1.052] |
| 67038  | 3.9  | 6.08 | 1.214 | 3   | 1.244   |
| 57275  | 3.2  | 9.1  | 1.101 | 2   | 1.008   |
| 28275  | 6.2  | 4.53 | 0.944 | 2   | 1.055   |
| 103744 | 2.9  | 4.74 | 1.205 | 2   | 1.217   |
| 16827  | 11.3 | 6.11 | 0.893 | 2   | 1.052   |
| 306546 | 3.2  | 5.68 | 1.011 | 6   | 1.094   |
| 43590  | 17.6 | 8.31 | 0.84  | 6   | 1.071   |
| 92262  | 2.9  | 5.83 | 0.834 | 2   | 1.082   |
| 28416  | 27.1 | 8.76 | 1.23  | 5   | 1.108   |
| 28285  | 5.9  | 6.77 | 1.282 | 2   | 1.186   |
| 28783  | 40.4 | 7.71 | 1.096 | 8   | 1.084   |
| 29008  | 29.4 | 6.9  | 0.899 | 6   | 1.088   |
| 28319  | 22.5 | 7.63 | 0.964 | 6   | [1.099] |
| 39908  | 6.6  | 8.44 | 1.208 | 2   | 1.116   |
| 27172  | 7.8  | 6.54 | 1.263 | 2   | 1.099   |
| 78937  | 21.5 | 5.37 | 0.93  | 12  | 1.055   |
| 96729  | 9.3  | 4.93 | 0.939 | 8   | 1.092   |
| 94457  | 9.4  | 4.97 | 1.055 | 9   | 1.077   |
| 16851  | 67.6 | 7.96 | 1.207 | 162 | [1.084] |
| 17651  | 84.4 | 7.12 | 1.4   | 222 | [1.054] |
| 17834  | 95.2 | 7.85 | 1.389 | 156 | [1.060] |
| 55053  | 4.3  | 7.92 | 0.897 | 2   | 1.091   |

|        |      |      |       |    |         |
|--------|------|------|-------|----|---------|
| 33388  | 2.3  | 9.35 | 0.83  | 2  | 1.06    |
| 37005  | 2.2  | 9.27 | 0.83  | 2  | 1.06    |
| 40308  | 2    | 8.97 | 0.83  | 2  | 1.06    |
| 32541  | 25   | 6    | 0.89  | 11 | 1.062   |
| 50968  | 3.8  | 5.22 | 0.404 | 2  | 1.902   |
| 71023  | 3.6  | 8.39 | 0.137 | 3  | 1.411   |
| 65547  | 4.2  | 7.74 | 0.149 | 2  | 1.848   |
| 68408  | 2.7  | 8.68 | 0.36  | 3  | 2.461   |
| 66092  | 6    | 7.59 | 0.368 | 7  | [1.830] |
| 59431  | 5.1  | 5.7  | 0.709 | 3  | 1.058   |
| 79982  | 4.2  | 6.05 | 0.889 | 3  | 1.058   |
| 39703  | 34   | 8.93 | 0.777 | 11 | 1.071   |
| 77184  | 25.5 | 6.22 | 0.916 | 25 | [1.046] |
| 20131  | 28.6 | 7.07 | 0.717 | 5  | 1.101   |
| 236379 | 1.1  | 5.92 | 0.919 | 2  | 1.007   |
| 33148  | 16.8 | 4.34 | 1.02  | 4  | 1.11    |
| 12731  | 13.3 | 10   | 1.099 | 3  | 1.068   |
| 37577  | 9.9  | 4.62 | 0.927 | 2  | 1.019   |
| 19162  | 23   | 6.84 | 0.901 | 3  | 1.029   |
| 19317  | 25.7 | 6.97 | 0.934 | 3  | 1.021   |
| 13441  | 22.8 | 4.17 | 0.976 | 3  | 1.066   |
| 25228  | 19.6 | 8.26 | 1.029 | 3  | 1.03    |
| 23920  | 31.8 | 5.2  | 0.935 | 9  | 1.043   |
| 27685  | 63.8 | 5.71 | 1.058 | 15 | 1.047   |
| 22829  | 11.2 | 5.19 | 0.93  | 2  | 1.179   |

|        |      |      |       |    |         |
|--------|------|------|-------|----|---------|
| 31644  | 4.3  | 6.67 | 0.976 | 4  | 1.055   |
| 78460  | 4.9  | 5.42 | 0.93  | 2  | 1.022   |
| 49691  | 18.4 | 5.43 | 0.891 | 3  | 1.124   |
| 80187  | 3.3  | 6.54 | 0.988 | 2  | 1.088   |
| 16526  | 37.9 | 8.46 | 0.935 | 9  | 1.129   |
| 68519  | 3.6  | 5.07 | 0.98  | 2  | 1.077   |
| 64504  | 3.8  | 5.88 | 0.952 | 3  | 1.194   |
| 64694  | 7.5  | 4.77 | 0.965 | 4  | 1.048   |
| 11675  | 16.9 | 5.3  | 1.01  | 2  | 1.055   |
| 13544  | 23.4 | 3.7  | 0.97  | 2  | 1.041   |
| 63744  | 8.3  | 7.18 | 0.832 | 5  | 1.042   |
| 25441  | 10.7 | 5.93 | 0.94  | 3  | 1.086   |
| 24761  | 14.4 | 5.55 | 0.987 | 3  | 1.006   |
| 60847  | 22.4 | 7.92 | 0.996 | 10 | 1.107   |
| 26321  | 18.6 | 5.12 | 0.935 | 4  | 1.075   |
| 56831  | 35   | 5.87 | 0.966 | 12 | 1.054   |
| 51311  | 29.4 | 5.05 | 0.927 | 11 | 1.041   |
| 86923  | 30.7 | 6.94 | 0.877 | 24 | 1.039   |
| 52113  | 11   | 5.15 | 0.973 | 4  | 1.095   |
| 12207  | 23.2 | 5.32 | 0.879 | 2  | 1.235   |
| 313742 | 3.1  | 5.2  | 0.879 | 7  | 1.027   |
| 300825 | 1.1  | 5.4  | 1.024 | 2  | 1.025   |
| 81427  | 3.2  | 5.81 | 0.836 | 3  | 1.121   |
| 17512  | 42.9 | 6.02 | 1.029 | 8  | [1.049] |
| 27221  | 6.8  | 8.8  | 0.864 | 4  | 1.026   |

|        |      |      |       |    |         |
|--------|------|------|-------|----|---------|
| 295033 | 5.1  | 5.84 | 0.966 | 12 | 1.033   |
| 13817  | 27.6 | 4.8  | 0.95  | 3  | 1.858   |
| 7117   | 26   | 5.02 | 1.108 | 2  | 1.014   |
| 42257  | 11   | 6.57 | 0.967 | 4  | 1.116   |
| 25201  | 36.8 | 8.85 | 0.995 | 8  | 1.077   |
| 24537  | 46.2 | 8.39 | 1.006 | 8  | 1.05    |
| 96734  | 1.7  | 5.14 | 1.098 | 2  | 1.105   |
| 74624  | 4.2  | 7.23 | 0.866 | 3  | 1.013   |
| 35900  | 13   | 5.56 | 0.797 | 3  | 1.045   |
| 38471  | 12   | 4.69 | 0.843 | 3  | 1.087   |
| 38640  | 16.5 | 4.68 | 0.843 | 3  | 1.087   |
| 32289  | 20.6 | 4.65 | 0.935 | 5  | 1.079   |
| 53538  | 3.8  | 4.94 | 1.531 | 2  | 1.081   |
| 23127  | 17   | 9.18 | 0.928 | 4  | 1.083   |
| 21962  | 25.6 | 9.68 | 0.982 | 6  | 1.057   |
| 11705  | 25   | 6.15 | 0.952 | 6  | [1.220] |
| 57015  | 10.9 | 5.06 | 0.741 | 5  | 1.096   |
| 128056 | 25.2 | 5.77 | 0.951 | 24 | 1.023   |
